# Supplementary material for: Effectiveness of physical activity interventions for improving depression, anxiety and distress: an overview of systematic reviews
Source: PubMed Central journal article supplement — Br J Sports Med. 2023 Feb 16;57(18):1203–9. doi: 10.1136/bjsports-2022-106195 (PMC10579187; doi:10.1136/bjsports-2022-106195), 2023-02-16

eTable 1. Medline search strategy and terms

| MEDLINE(R) ALL <1946 to November 12, 2021><br>Ovid MEDLINE(R) ALL <1946 to November 19, 2021>                                                                                                                                                                                                                                                                                                                                                                                                                                                                                                                                                                                                                                                                                                                        |                                                                                                                                                                                                                                                                                                                                                                                                                                                                                                                                                                                                                                                                                                                                                                                                                                                               |
|----------------------------------------------------------------------------------------------------------------------------------------------------------------------------------------------------------------------------------------------------------------------------------------------------------------------------------------------------------------------------------------------------------------------------------------------------------------------------------------------------------------------------------------------------------------------------------------------------------------------------------------------------------------------------------------------------------------------------------------------------------------------------------------------------------------------|---------------------------------------------------------------------------------------------------------------------------------------------------------------------------------------------------------------------------------------------------------------------------------------------------------------------------------------------------------------------------------------------------------------------------------------------------------------------------------------------------------------------------------------------------------------------------------------------------------------------------------------------------------------------------------------------------------------------------------------------------------------------------------------------------------------------------------------------------------------|
| 1 Meta-Analysis as Topic/<br>2 meta analy\$.tw.<br>3 metaanaly\$.tw.<br>4 Meta-Analysis/<br>5 Systematic Review/ [addition]<br>6 Systematic Reviews as Topic/ [addition]<br>7 (systematic adj (review\$1 or overview\$1)).tw.<br>8 exp Review Literature as Topic/<br>9 or/1-8<br>10 cochrane.ab.<br>11 embase.ab.<br>12 (psychlit or psyclit).ab.<br>13 (psychinfo or psycinfo).ab.<br>14 (cinahl or cinhal).ab.<br>15 science citation index.ab.<br>16 bids.ab.<br>17 cancerlit.ab.<br>18 or/10-17<br>19 reference list\$.ab.<br>20 bibliograph\$.ab.<br>21 hand-search\$.ab.<br>22 relevant journals.ab.<br>23 manual search\$.ab.<br>24 or/19-23<br>25 selection criteria.ab.<br>26 data extraction.ab.<br>27 25 or 26<br>28 Review/<br>29 27 and 28<br>30 Comment/<br>31 Letter/<br>32 Editorial/<br>33 animal/ | 34 human/<br>35 33 not (33 and 34) 36 or/30-32,35<br>37 9 or 18 or 24 or 29<br>38 37 not 36<br>39 exp exercise/<br>40 exp exercise therapy/<br>41 exp sports/<br>42 Physical Fitness/<br>43 (physical* adj5 (fit* or train* or activ* or<br>endur* or exer*)).ti,ab.<br>44 (exercis* adj5 (train* or physical* or<br>activ*)).ti,ab.<br>45 sport*.ti,ab.<br>46 walk*.ti,ab.<br>47 swim*.ti,ab.<br>48 pilates.ti,ab.<br>49 step*.ti,ab.<br>50 HIIT.ti,ab.<br>51 (tai ji or tai chi or tai-ji or tai-chi).ti,ab.<br>52 (resistance adj3 train*).ti,ab.<br>53 39 or 40 or 41 or 42 or 43 or 44 or 45 or 46<br>or 47 or 48 or 49 or 50 or 51 or 52<br>54 38 and 53<br>55 depress*.ti,ab.<br>56 anxiety.ti,ab.<br>57 distress.ti,ab.<br>58 55 or 56 or 57<br>59 54 and 58<br>60 food.ti,ab.<br>61 diet*.ti,ab.<br>62 nutriti*.ti,ab.<br>63 59 not (60 or 61 or 62) |

eFigure 1. PRISMA flow diagram.

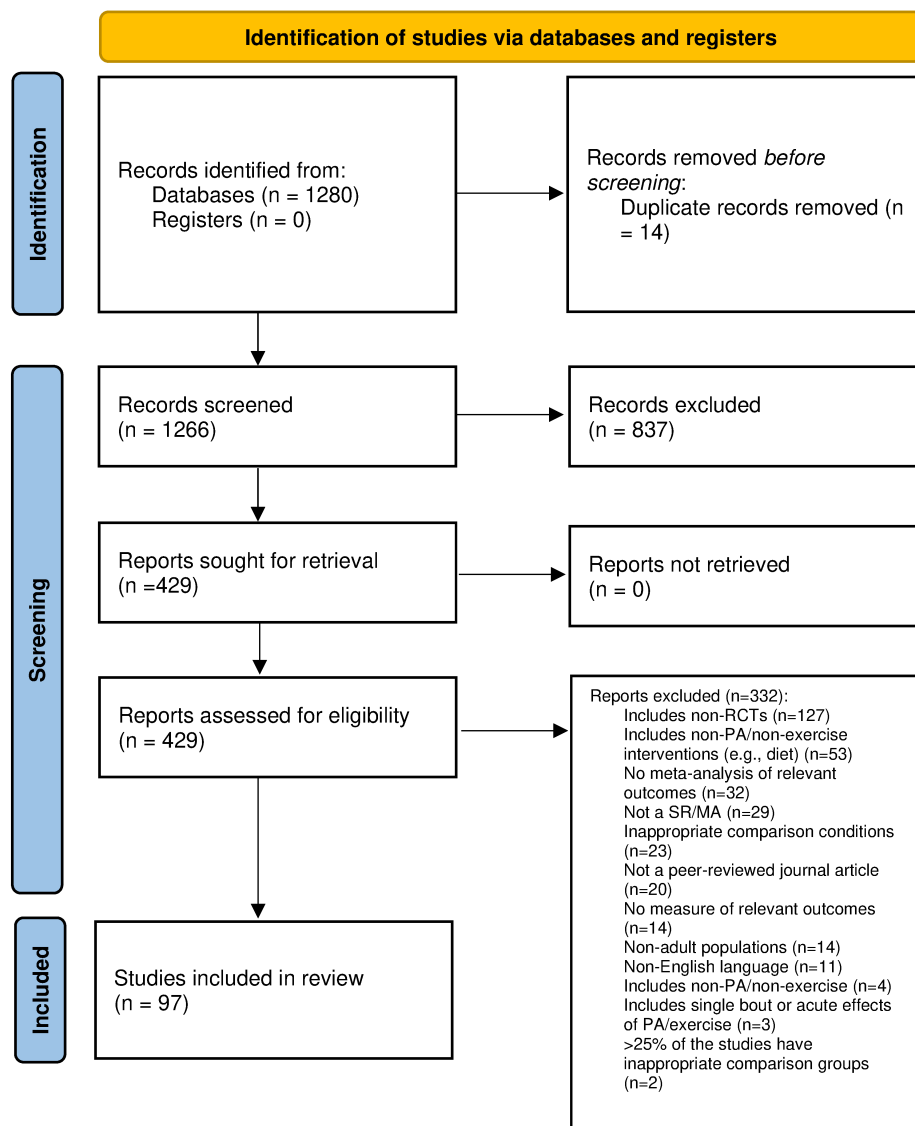

eFigure 2. Funnel plot showing the relationship between systematic review-level standardised mean differences and the number of studies included in each meta-analysis for depression and anxiety.

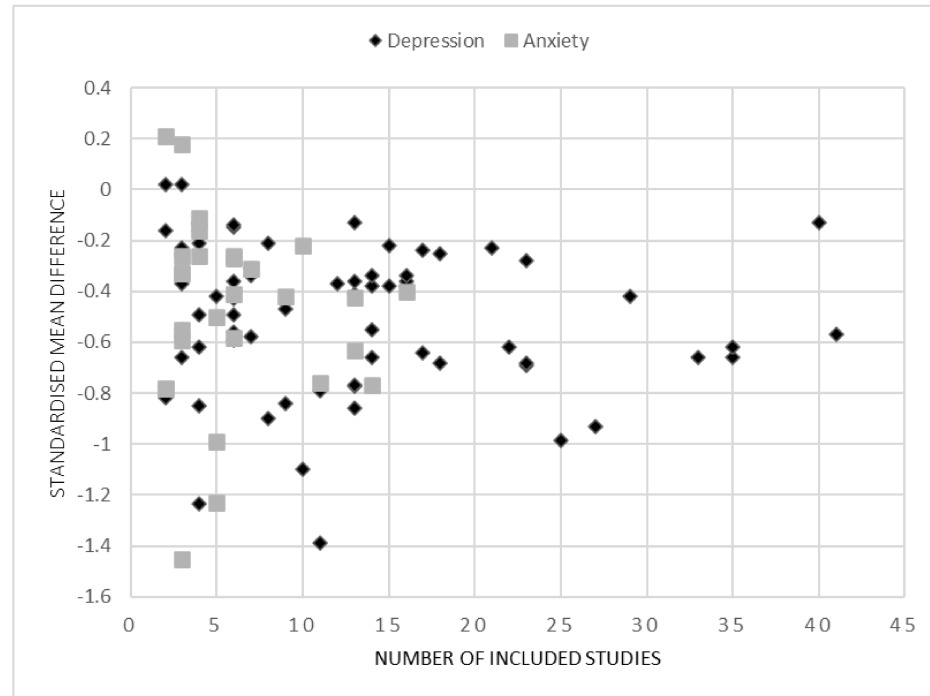

eTable 2. Overview of all included studies.

| Reference       | Studies (n=) | Total sample (n=) | Population or condition; gender; age mean±SD or range (years)   | Main interventions; intensity; duration (range).                       | Relevant outcomes (instruments)                                                                                                                                                                   | AMSTAR category |
|-----------------|--------------|-------------------|-----------------------------------------------------------------|------------------------------------------------------------------------|---------------------------------------------------------------------------------------------------------------------------------------------------------------------------------------------------|-----------------|
| Adamson 2015    | 26           | 1324              | Neurological disorders; males and females; mean±SD and range NR | AE, RE, Yoga, Tai Chi, Qigong, gymnastics; various intensities; 4w-52w | 1) Depression (BDI, BDI-II, CES-D, CESD-10, CSDD, GDS, HADS, IDS-SR, Levine-Pilowsky depression questionnaire, MADRS, MDI, POMS)                                                                  | Critically low  |
| Aylett 2018     | 15           | 675               | Anxiety; males and females; mean±SD and range NR                | AE, RE; various intensities; 2w-10w                                    | 1) Anxiety (PSWQ, Liebowitz Social scale, Anxiety Sensitivity Index, BAI, STAI)                                                                                                                   | Critically low  |
| Barreto 2015    | 20           | 1627              | Dementia; males and females; mean±SD and range NR               | AE, RE, Tai Chi, dance; various intensities; 6w-1y                     | 1) Depression (GDS-15, GDS-30, MADRS, GSDD)                                                                                                                                                       | Critically low  |
| Bellón 2021     | 14           | 1737              | Adults without depression; males and females; 44.7±18.6         | AE, RE, Yoga; various intensities; 4w-2y                               | 1) Depression (HADS, PHQ-9, BDI, SCID-I, EPDS, POMS, CES-D, BDI-FS, GDS, BDI-II)                                                                                                                  | Critically low  |
| Bergenthal 2014 | 9            | 818               | Haematological cancer; males and females; 50.7±2.4              | AE, RE; various intensities; 10d-36w                                   | 1) Depression (not specified)<br>2) Anxiety (not specified)                                                                                                                                       | High            |
| Bradt 2015      | 3            | 207               | Breast cancer; females; 55.4±4.8                                | Dance; various intensities; 3w-12w                                     | 1) Depression (POMS, HADS)<br>2) Anxiety (HADS, Symptom Checklist 90-Revised)                                                                                                                     | High            |
| Bridle 2012     | 9            | 667               | Older adults with depression; males and females; 75.7±6.8       | AE, RE, Tai Chi, Qigong; various intensities; 12w-1y                   | 1) Depression (PHQ-9, GDS, HSCL-20, CES-D, HRSD, BDI, CSDD)                                                                                                                                       | Low             |
| Brinsley 2020   | 19           | 1080              | Mental disorders; males and females; 38.5±9.4                   | Yoga; various intensities; 5w-12w                                      | 1) Depression (PANSS, HDRS, CES-D, HAD-C, FBGL, DASS-21, CDS, BDI, CAPS, HAM-D-21, QIDS)                                                                                                          | Critically low  |
| Broderick 2015  | 8            | 457               | Schizophrenia; males and females; mean±SD and range NR          | Yoga; various intensities; 4w-16w                                      | 1) Depression (Calgary Depression Scale)                                                                                                                                                          | Low             |
| Brown 2012      | 40           | 2929              | Cancer; males and females; 51.3±6.5                             | AE, RE, Yoga; various intensities; 3w-1y                               | 1) CES-D, Center for Epidemiologic Studies Depression scale; POMS, Profile of Mood States; BDI, Beck Depression Inventory; HADS, Hospital Anxiety and Depression Scale; Symptom Assessment Scale. | Critically low  |
| Carneiro 2020   | 4            | 295               | Depression; males and females; 61.1±14.4                        | RE; various intensities; 10w-16w                                       | 1) Depression (HAM-D, CES-D, GDS, BDI)                                                                                                                                                            | Low             |
| Carter 2019     | 18           | 1428              | Postnatal women; females; 29.3±2.9                              | AE, RE; various intensities; 6w-14m                                    | 1) Depression (DASS, EPDS, GHQ12, HDRS, IDAS, PHQ, SCID, SF-36, HAM-D, SCID-PN diagnosis, SF-36v2, CES-D, PHQ-9, SCID-I)                                                                          | Low             |

| Reference      | Studies (n=) | Total sample (n=) | Population or condition; gender; age mean±SD or range (years)                         | Main interventions; intensity; duration (range).                           | Relevant outcomes (instruments)                                                                                                                                                                                                | AMSTAR category |
|----------------|--------------|-------------------|---------------------------------------------------------------------------------------|----------------------------------------------------------------------------|--------------------------------------------------------------------------------------------------------------------------------------------------------------------------------------------------------------------------------|-----------------|
| Chi 2013       | 4            | 253               | Older adults with depressive symptoms; males and females; mean±SD NR; age range=52-82 | Tai Chi; low-intensity; 12w-24w                                            | 1) Depression (DASS-21, CES-D)                                                                                                                                                                                                 | Critically low  |
| Choo 2020      | 13           | 869               | Chronic diseases; males and females; 67.2±3.5                                         | Tai Chi; low-intensity; 10w-24w                                            | 1) Depression (CES-D, Zung depression scale, Depression, Anxiety, and Stress Scales)                                                                                                                                           | Low             |
| Chung 2017     | 17           | 651               | End Stage Renal Disease; males and females; mean±SD and range NR                      | AE, RE; various intensities; 8w-48w                                        | 1) Depression (Zung depression scale, BDI, SF-36)                                                                                                                                                                              | Critically low  |
| Cooney 2013    | 39           | 2326              | Depression; males and females; 52.7±19.3                                              | AE, RE; various intensities; 10d-16w                                       | 1) Depression (Hamilton Rating Scale for Depression, BDI, BDI-II, Lubin's Depression Adjective List, Zung Depression Scale, MADRS, HAM-D, Global Assessment Scale, CES-D, POMS, Cornell Scale for Depression in Dementia, GDS) | High            |
| Coventry 2007  | 6            | 545               | COPD; males and females; 65.3±2.9                                                     | AE, RE; various intensities; 5w-1y                                         | 1) Depression (HADS, Lorr-McNair Mood Questionnaire, CES-D, SCL-90-R)<br>2) Anxiety (HADS, STAI-State Anxiety, SCL-90-R)                                                                                                       | Critically low  |
| Craft 2012     | 15           | 1371              | Cancer; males and females; 55.1±7.8                                                   | AE, RE; various intensities; 6w-6m                                         | 1) Depression (CES-D Short Form, CES-D, BDI-II, HADS)                                                                                                                                                                          | Critically low  |
| Dalgas 2015    | 15           | 591               | Multiple sclerosis; males and females; 46.7±6.3                                       | AE, RE, water aerobics, yoga, sports climbing; various intensities; 3w-26w | 1) Depression (BDI-I, BDI-II HADS-D, MDI, CES-D, IDS-SR30, POMS)                                                                                                                                                               | Critically low  |
| deAlmeida 2020 | 16           | 1129              | Dementia; males and females; 77.3±7.3                                                 | AE, RE; various intensities; 6w-2y                                         | 1) Depression (Cornell Scale for Depression in Dementia, NPI Depression, GDS – Short Form)<br>2) Anxiety (Generalized Anxiety Disorder 7-item, NPI Anxiety)                                                                    | Critically low  |
| Duan 2020      | 15           | 1461              | Cancer; males and females; 54.6±6.6                                                   | Yoga, Qigong, Tai Chi, Dance; various intensities; 3w-24w                  | 1) Depression (HADS, BDI, CES-D, PHQ-9)<br>2) Anxiety (FACT-B, FACT-C, SF-12, FACT-G)<br>3) Distress (Perceived Stress Scale General Quality of Life: FACT-G, FACT-B, EORTC-QLQ-C-30)                                          | Critically low  |
| Eng 2014       | 13           | 1022              | Stroke; males and females; mean±SD NR; age range=21-93                                | AE, RE; various intensities; 4-12w                                         | 1) Depression (HADS, GDS, BDI, CES-D)                                                                                                                                                                                          | Critically low  |
| Ensari 2014    | 13           | 477               | Multiple sclerosis; males and females; 45.1±5.8                                       | AE, RE, water aerobics, yoga; various intensities; 4-26w                   | 1) Depression (BFI, IFD, MDI, BDI-II, HADS, CES-D, POMS, POMS-SF)                                                                                                                                                              | Critically low  |

| Reference      | Studies (n=) | Total sample (n=) | Population or condition; gender; age mean±SD or range (years)       | Main interventions; intensity; duration (range).                     | Relevant outcomes (instruments)                                                                             | AMSTAR category |
|----------------|--------------|-------------------|---------------------------------------------------------------------|----------------------------------------------------------------------|-------------------------------------------------------------------------------------------------------------|-----------------|
| Felbel 2014    | 1            | 39                | Haematological cancer; males and females; 51                        | Yoga; low intensity; 7w                                              | 1) Depression (CES-D)<br>2) Anxiety (STAI)<br>3) Distress (Impact of Events Scale)                          | High            |
| Ferreira 2021  | 8            | 376               | Kidney disease; males and females; 51.7±8.6                         | AE, RE, Pilates, intradialytic exercise; various intensities; 4w-48w | 1) Depression (HADS, DASS, BDI, General Health Dimensions - depression subscale)<br>2) Anxiety (HADS, DASS) | Critically low  |
| Fong 2012      | 34           | 4113              | Cancer; males and females; 55.7±5.8                                 | AE, RE, Yoga; various intensities; 3w-60w                            | 1) Depression (HADS, BDI)<br>2) Anxiety (HADS)                                                              | Critically low  |
| Forbes 2008    | 4            | 280               | Dementia; males and females; mean±SD and range NR                   | AE, RE; various intensities; 2w-1y                                   | 1) Depression (MADRS)                                                                                       | Low             |
| Furmaniak 2016 | 32           | 2626              | Breast cancer; females; mean±SD and range NR                        | AE, RE; various intensities; 6w-1y                                   | 1) Depression (BDI, CES-D, HADS)<br>2) Anxiety (STAI, HADS)                                                 | High            |
| Gascoyne 2020  | 4            | 133               | Multiple sclerosis; males and females; 43.9±7.6                     | AE, RE; various intensities; 8w-26w                                  | 1) Anxiety (POMS, HADS, STAI, BAI)                                                                          | Critically low  |
| Gong 2015      | 6            | 375               | Pregnant women; females only; mean±SD NR; range = 18-40             | Yoga; various intensities; 12w-16w                                   | 1) Depression (CES-D, HADS, EPDS)                                                                           | Critically low  |
| Gordon 2018    | 33           | 1877              | Adults with or without chronic conditions; males and females; 52±18 | RE; various intensities; 6w-1y                                       | 1) Depression (BDI, GDS, CES-D, MDI, MHFI, DACL, HRSD, BRUMS-D, HADS, POMS, SCL-90-D, DSM, DASS-21)         | Critically low  |
| Gouw 2019      | 13           | 1340              | Older adults with chronic disease; males and females; 70.4±6.2      | Qigong; low intensity; 8w-26w                                        | 1) Depression (GDS, HADS, HRSD, Self-rating scale)                                                          | Critically low  |
| Guo 2020       | 16           | 1096              | COPD, males and females; 67.4±4.9                                   | Tai Chi; various intensities; 2w-1y                                  | 1) Depression (HADS, Self-rating scale)<br>2) Anxiety (HADS, Self-rating scale)                             | Critically low  |
| Hall 2021      | 17           | 1456              | Knee osteoarthritis; males and females; 65.9±4.6                    | AE, RE, Yoga, Tai chi, Qigong; various intensities; 6w-1y            | 1) Depression (HADS, CES-D)<br>2) Anxiety (HADS)                                                            | Critically low  |
| Heinzel 2015   | 18           | 1063              | Older adults; males and females; 71.9±6.0                           | AE, RE, Tai chi, Qigong; various intensities; 6w-26w                 | 1) Depression (HADS, HDG, HAM-D, PHQ-9, BDI, DSM-IV diagnostic criteria)                                    | Critically low  |
| Heissel 2019   | 10           | 479               | HIV; males and females; mean±SD and range NR                        | AE, RE, Yoga; various intensities; 4w-12w                            | 1) Depression (BDI, GHQ-28, POMS, HADS)<br>2) Anxiety (GHQ-28, POMS, HADS, STAI)                            | High            |

| Reference      | Studies (n=) | Total sample (n=) | Population or condition; gender; age mean±SD or range (years) | Main interventions; intensity; duration (range).     | Relevant outcomes (instruments)                                                                                         | AMSTAR category |
|----------------|--------------|-------------------|---------------------------------------------------------------|------------------------------------------------------|-------------------------------------------------------------------------------------------------------------------------|-----------------|
| Herring 2017   | 14           | 624               | Multiple Sclerosis; males and females; 44±6.6                 | AE, RE, Yoga; various intensities; 3w-26w            | 1) Depression (BDI, CES-D, HADS, IDS-SR, POMS, MDI)                                                                     | Critically low  |
| Josefsson 2014 | 15           | 880               | Depression; males and females; 46.3±13                        | AE, RE; various intensities; 4w-16w                  | 1) Depression (HRSD, BDI, MARDS, PHQ-9, MMPI)                                                                           | Critically low  |
| Kelley 2018    | 14           | 926               | Arthritis and rheumatic diseases; males and females; 54.5±8.9 | AE; RE; various intensities; 8w-32w                  | 1) Depression (AIMS, BDI, CES-D, DASS-21, FIQ, HADs, MHI, VAS)<br>2) Anxiety (STAI, AIMS, HADS, DASS-21, MHI, FIQ, VAS) | High            |
| Kelley 2015    | 29           | 2449              | Arthritis; males and females; 52.3±9.7                        | AE, RE, Tai chi, Qigong; various intensities; 4w-32w | 1) Depression (BDI, CES-D, DASS-21, MIH, FIQ, AIMS, POMS, HADS, VAS)                                                    | High            |
| Krogh 2017     | 35           | 2498              | Depression; males and females; 44±12.8                        | AE, RE; various intensities; 2w-32w                  | 1) Depression (HAM-D17, SCL-D, BDI, MADRS, PHQ-9)                                                                       | Low             |
| Kvam 2016      | 23           | 977               | Depression; males and females; 36.9±14.4                      | AE, RE; various intensities; 1w-8m                   | 1) Depression (HAMD-17, MDD, BDI, BDI-II, SCL-90)                                                                       | Critically low  |
| Lawlor 2001    | 14           | 479               | Depression; males and females; 44.7±17                        | AE, RE; various intensities; 4w-12w                  | 1) Depression (BDI, Depression symptom checklist)                                                                       | Critically low  |
| Lawrence 2017  | 2            | 72                | Stroke; males and females; 59.5±4.6                           | Yoga; various intensities; 8w-10w                    | 1) Depression (GDS15)<br>2) Anxiety (STAI, STAI-Y1, STAI-Y2, Stroke Impact Scale version 3)                             | Critically low  |
| Lee 2021       | 22           | 1025              | Depression; males and females; 48.5±12.6                      | AE, RE; various intensities; 10d-24w                 | 1) Depression (BDI-II, HAM-D, BDI, MADRS, MARDS-S, BRMS, GDS)                                                           | Critically low  |
| Lee 2020       | 29           | 2989              | Breast cancer; females; 50±7.7                                | AE, RE; Yoga; various intensities; 4w-26w            | 1) Depression (HADS, CES-D)<br>2) Anxiety (HADS, Spielberger State-Anxiety Inventory)                                   | Critically low  |
| Leng 2018      | 21           | 2589              | Cognitive impairment; males and females; 76.3±5.9             | AE, RE, Tai Chi, Yoga; various intensities; 6w-1y    | 1) Depression (CSDD, GDS, Depression Rating Scale, BDI, HAMD)                                                           | Critically low  |
| Liu 2019       | 6            | 429               | Lymphoma; males and females; 53.6±6.4                         | AE, Yoga, Qigong; various intensities; 3w-36w        | 1) Depression (CES-D)                                                                                                   | Critically low  |
| Li 2019        | 13           | 906               | COPD; males and females; 63.9±6.9                             | Yoga, Qigong, Tai chi, various intensities; 8w-48w   | 1) Depression (CES-D, SSAI, HADS, BDI, Self-rating scale, HAMD)<br>2) Anxiety (HADS, STAI, Self-rating scale, HAMA)     | Critically low  |

| Reference       | Studies (n=) | Total sample (n=) | Population or condition; gender; age mean±SD or range (years)               | Main interventions; intensity; duration (range).                  | Relevant outcomes (instruments)                                                                                                                                          | AMSTAR category |
|-----------------|--------------|-------------------|-----------------------------------------------------------------------------|-------------------------------------------------------------------|--------------------------------------------------------------------------------------------------------------------------------------------------------------------------|-----------------|
| Li 2019         | 20           | 2051              | Dementia; males and females; 80.9±5.1                                       | AE, RE, dance; various intensities; 6w-18m                        | 1) Depression (HAMD-17, GDS, CSDD, MADRS)                                                                                                                                | Critically low  |
| Lund 2020       | 8            | 552               | Colorectal cancer; males and females; 58±4.6                                | AE, RE; various intensities; 6w-24w                               | 1) Depression (HADS, BDI)                                                                                                                                                | Critically low  |
| Lyu 2021        | 11           | 732               | Stroke patients with mental or sleep disorders; males and females; 62.2±6.6 | Tai Chi; low intensity; 6w-24w                                    | 1) Depression (CES-D, HAM-D, BDI)<br>2) Anxiety (HAMA)                                                                                                                   | Critically low  |
| McCurdy 2017    | 16           | 1327              | Postpartum women, females; 29.6±2.8                                         | AE, RE, Yoga; various intensities; 6w-1y                          | 1) Depression (EPDS, CES-D, HAMD)                                                                                                                                        | Critically low  |
| McGettigan 2020 | 16           | 992               | Colorectal cancer; males and females; 59.5±4.6                              | AE, RE; various intensities; 6w-1y                                | 1) Depression (HADS, CES-D)<br>2) Anxiety (HADS, STAI)                                                                                                                   | Low             |
| McGranahan 2021 | 4            | 149               | PTSD; males and females; 44.7±16.3                                          | AE, RE; various intensities; 3w-12w                               | 1) Depression (CES-D, DASS, PHD)<br>2) Anxiety (STAI, DASS)                                                                                                              | Critically low  |
| Miller 2020     | 69           | 5379              | Older adults; males and females; 73.4±5.6                                   | AE, RE, Yoga, Tai Chi, Qigong; various intensities; 4w-15m        | 1) Depression (BDI, CESD-20, POMS-D, GDS-15, GDS-30, BDI-II, MADRS, GADS-D, CSDD, TDQ, HADS-D, HRSD, DASS-D, IDS-C, GDS-5, POMS-SF-D, CESD-10, PROMIS-EDD SF-8a, CESD-6) | Low             |
| Miller 2020     | 15           | 596               | Older adults with depression; males and females; 73.9±5.9                   | AE, RE, Yoga, Tai Chi, Qigong, dance; various intensities; 4w-16w | 1) Depression (GDS-15, CESD-20, GDS-30, HRSD, BDI, CSDD)                                                                                                                 | Low             |
| Mishra 2012     | 40           | 3694              | Cancer; males and females; 53.3±5.4                                         | AE, RE, Yoga, Tai Chi, Qigong; various intensities; 3w-1y         | 1) Depression (CES-D, HADS, BDI, VAS, POMS)<br>2) Anxiety (HADS, STAI, VAS, POMS)                                                                                        | High            |
| Morres 2019     | 11           | 455               | Depression; males and females; Mean (SD) = 37 (9.4); range = 20.9-49.1      | AE; various intensities; 10d-32w                                  | 1) Depression (HAMD-17, BDI, CIS, MADRS)                                                                                                                                 | Critically low  |
| Nebiker 2018    | 27           | 1452              | Depression; males and females; 49.5±16.0                                    | AE, RE, Yoga, Tai Chi; various intensities; 10d-32w               | 1) Depression (BDI, BDI-II, HRSD, CES-D, GDS-15, GDS, HAM-D, MADRS, PHQ-9)                                                                                               | Critically low  |



| Reference             | Studies (n=) | Total sample (n=) | Population or condition; gender; age mean±SD or range (years) | Main interventions; intensity; duration (range).            | Relevant outcomes (instruments)                                                                                                                                                                        | AMSTAR category |
|-----------------------|--------------|-------------------|---------------------------------------------------------------|-------------------------------------------------------------|--------------------------------------------------------------------------------------------------------------------------------------------------------------------------------------------------------|-----------------|
| Nixon 2005            | 10           | 276               | HIV/AIDS; males and females; mean±SD NR; age range=18-58      | AE, RE; various intensities; 5w-24w                         | 1) Depression (POMS)                                                                                                                                                                                   | Critically low  |
| Park 2014             | 18           | 3297              | Older adults; males and females; mean±SD and range NR         | AE, RE, Yoga, Tai Chi, dance; various intensities; 4w-2y    | 1) Depression (GDS, GDS-15, HADS, Zung Self-rating depression scale, CES-D)                                                                                                                            | Critically low  |
| Patsou 2017           | 14           | 1701              | Breast cancer; females; 52.1±2.9                              | AE, RE, Yoga; various intensities; 6-1y                     | 1) Depression (HADS, BDI-II, CES-D, POMS)                                                                                                                                                              | Critically low  |
| Pavey 2011            | 8            | 5109              | Adults; males and females; 59±7                               | AE; various intensities 8w-52w                              | 1) Depression (not specified)                                                                                                                                                                          | Critically low  |
| Pearsall 2014         | 8            | 374               | Schizophrenia; males and females; mean±SD NR; range = 27-52   | AE; various intensities 10w-24w                             | 1) Depression (BSI, WHOQOL-BREF-TR, BDI, MHI, CGI-Severity)<br>2) Anxiety (BSI, WHOQOL-BREF-TR, MHI, CGI-Severity)                                                                                     | Critically low  |
| Peddle-McIntyre6 2019 | 6            | 221               | Lung cancer; males and female; 60.9±5.3                       | AE, RE; various intensities; 4w-12w                         | 1) Depression (GHQ-12, HADS)<br>2) Anxiety (GHQ-12, HADS)                                                                                                                                              | Critically low  |
| Pentland 2021         | 5            | 242               | Postpartum women; females; 30±3.5                             | AE, RE; various intensities; 12w-6m                         | 1) Depression (EPDS)                                                                                                                                                                                   | Critically low  |
| Ramachandran 2021     | 14           | 2869              | Heart disease; males and females; 59.4±5.7                    | AE; various intensities; 6w-6m                              | 1) Depression (Patient Health Questionnaire, CES-D, DASS)                                                                                                                                              | Critically low  |
| Ramirez-velez 2021    | 57           | 6988              | Breast cancer; females; 52.3±3.3                              | AE, RE; various intensities; 5w-1y                          | 1) Depression (HADS, FACT-B Depression, BDI, Finnish version of modified BDI, CES-D)<br>2) Anxiety (HADS, FACT-B Anxiety, Social Physique Anxiety Scale-7, SSAI, State-Trait Anxiety Inventory (STAI)) | Critically low  |
| Ramos-Sanchez 2021    | 13           | 731               | Anxiety disorder; males and females; 39.2±11.7                | AE, RE; various intensities; 3w-20w                         | 1) Anxiety (Hamilton Scale for Anxiety, Penn State Worry Questionnaire, Anxiety stress scale, Chinese Mandarin version STAI)                                                                           | High            |
| Rhyner 2016           | 41           | NR                | Older adults; males and females; 73.9±5.2                     | AE, RE, Yoga, Tai Chi, Qigong; various intensities; 3w-144w | 1) Depression (GSD, CES-D, GSD-15, BDI, Taiwanese Depression Questionnaire, HSCL-20, DASS, HDRS, Cornell Scale for Depression in Dementia, MADRS)                                                      | Critically low  |

| Reference         | Studies (n=) | Total sample (n=) | Population or condition; gender; age mean±SD or range (years)                     | Main interventions; intensity; duration (range). | Relevant outcomes (instruments)                                                                                                                                                                                                                     | AMSTAR category |
|-------------------|--------------|-------------------|-----------------------------------------------------------------------------------|--------------------------------------------------|-----------------------------------------------------------------------------------------------------------------------------------------------------------------------------------------------------------------------------------------------------|-----------------|
| Rosenbaum 2015    | 4            | 200               | PTSD; males and females; 43.7±6.7                                                 | AE, RE, Yoga; various intensities; 6w-12w        | 1) Depression (PSS-I, PCL-C, CAPS)                                                                                                                                                                                                                  | Critically low  |
| Russ 2021         | 9            | 456               | Dementia; males and females; 85.5±1                                               | RE; various intensities; 12w-7m                  | 1) Depression (GDS, CCSD, MADRS)                                                                                                                                                                                                                    | Critically low  |
| Salihu 2021       | 28           | 2249              | Adults; males and females; 65.3±16                                                | Dance; various intensities; 10d-1y               | 1) Depression (BDI, GDS, POMS, CESD, HADS, DASS-21)<br>2) Anxiety (Test Anxiety Inventory, DASS-21, HADS, STAI)                                                                                                                                     | Critically low  |
| Schuch 2016       | 8            | 267               | Older adults with depression or depressive symptoms; males and females; 69.5±0.71 | AE, RE; various intensities; 6w-16w              | 1) Depression (HAM-D, GDS-15, BDI, GDS, PHQ-9, CES-D, CSDD)                                                                                                                                                                                         | Critically low  |
| Schuch 2016       | 25           | 1487              | Depression or depressive symptoms; males and females; 50.9±17.1                   | AE, RE; various intensities; 4w-32w              | 1) Depression (HAM-D, BDI, BDI-II, MARSD, GDS-15, CES-D, PHQ-9, DACL, MMPI, CSDD)                                                                                                                                                                   | Critically low  |
| Schumacher 2021   | 7            | 391               | Prostate cancer, males; 67.9±1.5                                                  | AE, RE; various intensities; 4w-24w              | 1) Depression (CES-D, BDI)                                                                                                                                                                                                                          | Critically low  |
| Singh 2018        | 61           | 5200              | Breast cancer; females; 53±3.6                                                    | AE, RE, Yoga; various intensities; 6w-1y         | 1) Depression (POMs, HADs, CES-D, Greene Climacteric Scale, NDI, Functional Living Index of Cancer)<br>2) Anxiety (POMs, HADs, STAI, FACT-Amemia, Greene Climacteric Scale, SSAI, Social Physique Anxiety Scale, Functional Living Index of Cancer) | Critically low  |
| Singh 2020        | 31           | 2109              | Lung cancer; males and females; 64±3                                              | AE, RE, Yoga; various intensities; 1w-20w        | 1) Depression (HADs, GHQ)<br>2) Anxiety (HADs, GHQ)                                                                                                                                                                                                 | Critically low  |
| Stathopoulou 2006 | 11           | 513               | Depression; males and females; mean±SD and range NR                               | AE, RE; various intensities; 4w-16w              | 1) Depression (HRSD, EPSD, BDI, Self-rating scale, Depression - Symptom Checklist 90)                                                                                                                                                               | Critically low  |
| Stubbs 2017       | 6            | 262               | Anxiety or stress disorder; males and females; 34.7±9.6                           | AE; various intensities; 6w-12w                  | 1) Anxiety (HAM-A, Penn State Worry Questionnaire, PSWQ, DASS21, PTSD symptom scale, PSSI, PTSD checklist–civilian version)                                                                                                                         | Critically low  |

| Reference      | Studies (n=) | Total sample (n=) | Population or condition; gender; age mean±SD or range (years) | Main interventions; intensity; duration (range).           | Relevant outcomes (instruments)                                                                                                                                                                                                                                        | AMSTAR category |
|----------------|--------------|-------------------|---------------------------------------------------------------|------------------------------------------------------------|------------------------------------------------------------------------------------------------------------------------------------------------------------------------------------------------------------------------------------------------------------------------|-----------------|
| Tu 2014        | 19           | 3447              | Heart failure; males and females; 63.7±7.8                    | AE, RE, Tai Chi; various intensities; 6w-76w               | 1) Depression (Depression - Symptom Checklist 90, HADS, BDI, BDI-II, MADRS, Multiple Affect Adjective Checklist, GDS, HAM-D, Cognitive Behavioural Assessment Hospital form, CES-D, Psychological General Well-being Index, Hare-Davis Cardiac Depression Scale, POMS) | Critically low  |
| vanHaren 2013  | 11           | 734               | Cancer; males and females; mean±SD and range NR               | RE, AE; various intensities; 4w-24w                        | 1) Depression (POMS, HADS)<br>2) Anxiety (POMS, HADS)<br>3) Distress (Self-perception scale of physical and emotional well-being)                                                                                                                                      | Critically low  |
| Vashistha 2016 | 13           | 1057              | Prostate cancer; males; 69.2±2.3                              | AE, RE, Qigong; various intensities; 4w-6m                 | 1) Depression (BSI-18)<br>2) Anxiety (BSI-18)                                                                                                                                                                                                                          | Critically low  |
| Wang 2014      | 22           | 2894              | Substance use disorder; males and females; 38.9±5.8           | AE, RE, Yoga, Tai Chi, sports; various intensities; 10d-6m | 1) Depression (BDI, CES-D, Self-rating depression scale, HADS)<br>2) Anxiety (Self-rating scale, Hamilton Anxiety Scores, Mood and Physical Symptoms Scale-anxiety, STAI)                                                                                              | Critically low  |
| Wang 2019      | 12           | 516               | Heart failure; males and females; mean±SD NR; range = 43-74   | AE, RE; various intensities; 8w-48w                        | 1) Depression (not specified)                                                                                                                                                                                                                                          | Critically low  |
| Weber 2020     | 37           | 3224              | Older adults; males and females; 72.2±7.3                     | Tai Chi, Qigong, Yoga, Pilates; various intensities; 4w-1y | 1) Depression (GDS, GDS-SF, HADS, BDI, BDI-II, CES-D, DASS-21, MHI-18, POMS, POMS-SF, Taiwanese Depression Questionnaire, Warwick-Edinburgh Mental Well-being Scale)                                                                                                   | Critically low  |
| Wu 2019        | 6            | 415               | COPD; males and females; 66.3±4.6                             | Qigong; various intensities; 4w-24w                        | 1) Depression (Self-rating scale)<br>2) Anxiety (Self-rating scale)                                                                                                                                                                                                    | Critically low  |
| Xiang 2017     | 10           | 689               | Fatigue; males and females; mean±SD NR; range=18-88           | Tai Chi; various intensities; 4w-6m                        | 1) Depression (POMS, POMS-SF, IDS-C, CES-D, BDI, BDI-II)                                                                                                                                                                                                               | Critically low  |
| Yi 2021        | 7            | 693               | Breast cancer; females; 50.4±3.5                              | Yoga; various intensities; 8w-16w                          | 1) Depression (BDI, POMS, HADS, Self-rating scale, CES-D)<br>2) Anxiety (POMS, HADs, Self-rating scale)                                                                                                                                                                | Critically low  |
| Zeng 2019      | 12           | 915               | Cancer; males and females; 62.2±4.3                           | Qigong; various intensities; 6w-12w                        | 1) Depression (DASS, HADS)<br>2) Anxiety (DASS, HADS)<br>3) Stress (BSI, FACT-G)                                                                                                                                                                                       | Critically low  |

| Reference                                                                         | Studies (n=) | Total sample (n=) | Population or condition; gender; age mean±SD or range (years)            | Main interventions; intensity; duration (range). | Relevant outcomes (instruments)                                                                                                                                                                                              | AMSTAR category |
|-----------------------------------------------------------------------------------|--------------|-------------------|--------------------------------------------------------------------------|--------------------------------------------------|------------------------------------------------------------------------------------------------------------------------------------------------------------------------------------------------------------------------------|-----------------|
| Zeng 2014                                                                         | 13           | 592               | Cancer; males and females; mean±SD and range NR                          | Tai Chi; various intensities; 6w-24w             | 1) Depression (BDI, CES-D)<br>2) Anxiety (BAI)                                                                                                                                                                               | Critically low  |
| Zeng 2019                                                                         | 10           | 838               | Cancer; males and females; 52.5±4.1                                      | AE, RE; various intensities; 8w-96w              | 1) Depression (Not specified)                                                                                                                                                                                                | Critically low  |
| Zhang 2019                                                                        | 5            | 803               | Older adults with mild cognitive impairment; males and females; 74.8±5.7 | Tai Chi; various intensities; 12w-1y             | 1) Depression (CDS)                                                                                                                                                                                                          | Critically low  |
| Zhao 2019                                                                         | 13           | 614               | End-stage renal disease; males and females; 54.58±11.68                  | AR, RE, Yoga; various intensities; 8w-1y         | 1) Depression (BDI, HADS)<br>2) Anxiety (HADS)                                                                                                                                                                               | Critically low  |
| Zhou 2021                                                                         | 8            | 570               | Lung cancer; males and females; 64.4±2.1                                 | AR, RE, Tai Chi; various intensities; 6w-12w     | 1) Depression (HADS, GHQ-12)<br>2) Anxiety (HADS, GHD)                                                                                                                                                                       | Critically low  |
| Zuo 2016                                                                          | 21           | 1762              | Breast cancer; females; 42.6±4.7                                         | Yoga; various intensities; 2w-24w                | 1) Depression (HADS, BDI, CES-D, DMI, Self-rating scale)<br>2) Anxiety (HADS, STAI, Self-rating scale)<br>3) Distress (Positive and Negative Affect Schedule, Subjective Symptom Checklist, The Rotterdam Symptom Checklist) | Critically low  |
| Abbreviations:<br>AE: Aerobic exercise; RE: Resistance exercise; NR: Not reported |              |                   |                                                                          |                                                  |                                                                                                                                                                                                                              |                 |

eTable 3. AMSTAR 2 quality appraisal of reviews.

| Review          | AMSTAR 2 Items |    |   |    |   |   |   |    |   |    |    |    |    |    |    |    | Overall confidence rating |
|-----------------|----------------|----|---|----|---|---|---|----|---|----|----|----|----|----|----|----|---------------------------|
|                 | 1              | 2  | 3 | 4  | 5 | 6 | 7 | 8  | 9 | 10 | 11 | 12 | 13 | 14 | 15 | 16 |                           |
| Adamson 2015    | Y              | N  | Y | PY | Y | Y | N | N  | Y | N  | Y  | N  | N  | Y  | N  | N  | Critically low            |
| Aylett 2018     | Y              | N  | Y | N  | Y | Y | Y | Y  | Y | N  | N  | N  | N  | Y  | N  | Y  | Critically low            |
| Barreto 2015    | Y              | N  | Y | PY | Y | Y | N | Y  | Y | N  | Y  | Y  | Y  | Y  | Y  | Y  | Critically low            |
| Bellón 2021     | Y              | N  | Y | Y  | Y | Y | N | Y  | Y | N  | Y  | Y  | Y  | Y  | Y  | Y  | Critically low            |
| Bergenthal 2014 | Y              | Y  | Y | Y  | Y | Y | Y | Y  | Y | Y  | Y  | Y  | Y  | Y  | Y  | Y  | High                      |
| Bradt 2015      | Y              | Y  | Y | Y  | Y | Y | Y | Y  | Y | Y  | Y  | Y  | Y  | Y  | Y  | Y  | High                      |
| Bridle 2012     | Y              | Y  | Y | Y  | Y | Y | N | Y  | Y | Y  | Y  | Y  | Y  | Y  | Y  | Y  | Low                       |
| Brinsley 2020   | Y              | PY | Y | Y  | Y | Y | N | Y  | Y | Y  | N  | N  | Y  | N  | Y  | Y  | Critically low            |
| Broderick 2015  | Y              | PY | Y | Y  | Y | Y | Y | Y  | Y | Y  | Y  | Y  | Y  | Y  | N  | Y  | Low                       |
| Brown 2012      | Y              | N  | Y | N  | N | Y | N | PY | Y | Y  | Y  | Y  | Y  | N  | Y  | Y  | Critically low            |
| Carneiro 2020   | Y              | PY | Y | Y  | Y | N | Y | PY | Y | Y  | Y  | Y  | Y  | Y  | N  | Y  | Low                       |
| Carter 2019     | Y              | Y  | Y | Y  | Y | Y | N | Y  | Y | Y  | Y  | Y  | Y  | Y  | Y  | Y  | Low                       |
| Chi 2013        | Y              | PY | Y | Y  | Y | Y | N | Y  | Y | Y  | Y  | Y  | Y  | Y  | N  | Y  | Critically low            |
| Choo 2020       | Y              | PY | Y | Y  | Y | Y | Y | Y  | Y | Y  | Y  | Y  | Y  | Y  | N  | Y  | Low                       |
| Chung 2017      | Y              | N  | Y | N  | Y | Y | N | N  | Y | N  | N  | Y  | Y  | Y  | Y  | Y  | Critically low            |
| Cooney 2013     | Y              | PY | Y | Y  | Y | Y | Y | Y  | Y | N  | Y  | Y  | Y  | Y  | Y  | Y  | High                      |

| Review         | AMSTAR 2 Items |    |   |    |   |   |   |    |    |    |    |    |    |    |    |    | Overall confidence rating |
|----------------|----------------|----|---|----|---|---|---|----|----|----|----|----|----|----|----|----|---------------------------|
|                | 1              | 2  | 3 | 4  | 5 | 6 | 7 | 8  | 9  | 10 | 11 | 12 | 13 | 14 | 15 | 16 |                           |
| Coventry 2007  | Y              | N  | Y | PY | N | Y | N | Y  | PY | N  | Y  | Y  | Y  | Y  | N  | Y  | Critically low            |
| Craft 2012     | Y              | N  | Y | N  | Y | Y | Y | Y  | Y  | N  | Y  | N  | N  | Y  | Y  | Y  | Critically low            |
| Dalgas 2015    | Y              | N  | Y | N  | N | N | N | Y  | Y  | N  | Y  | N  | N  | Y  | N  | Y  | Critically low            |
| deAlmeida 2020 | Y              | PY | Y | N  | Y | N | N | Y  | Y  | N  | Y  | N  | N  | Y  | N  | Y  | Critically low            |
| Duan 2020      | Y              | N  | Y | N  | Y | Y | N | PY | Y  | N  | Y  | Y  | Y  | Y  | Y  | Y  | Critically low            |
| Eng 2014       | Y              | N  | Y | PY | N | Y | N | N  | Y  | N  | Y  | Y  | Y  | Y  | Y  | Y  | Critically low            |
| Ensari 2014    | Y              | N  | Y | PY | N | N | N | N  | Y  | N  | Y  | N  | Y  | Y  | Y  | Y  | Critically low            |
| Felbel 2014    | Y              | Y  | Y | PY | Y | Y | Y | Y  | Y  | Y  | Y  | Y  | Y  | Y  | Y  | Y  | High                      |
| Ferreira 2021  | Y              | Y  | Y | PY | Y | N | N | N  | Y  | N  | Y  | N  | Y  | Y  | N  | Y  | Critically low            |
| Fong 2012      | N              | N  | N | N  | Y | Y | N | PY | N  | N  | Y  | Y  | Y  | Y  | Y  | Y  | Critically low            |
| Forbes 2008    | Y              | PY | Y | Y  | Y | N | Y | Y  | Y  | N  | Y  | N  | Y  | Y  | N  | Y  | Low                       |
| Furmaniak 2016 | Y              | Y  | Y | Y  | Y | Y | Y | Y  | Y  | Y  | Y  | Y  | Y  | Y  | Y  | Y  | High                      |
| Gascoyne 2020  | Y              | Y  | Y | Y  | Y | Y | N | PY | N  | N  | Y  | N  | N  | Y  | N  | Y  | Critically low            |
| Gong 2015      | Y              | N  | Y | PY | N | Y | N | PY | PY | N  | Y  | N  | N  | Y  | N  | Y  | Critically low            |
| Gordon 2018    | Y              | N  | Y | N  | N | Y | N | PY | Y  | N  | Y  | N  | Y  | Y  | Y  | Y  | Critically low            |
| Gouw 2019      | Y              | N  | Y | Y  | Y | Y | N | PY | Y  | N  | Y  | N  | N  | N  | N  | Y  | Critically low            |
| Guo 2020       | Y              | Y  | N | N  | Y | Y | N | PY | Y  | N  | Y  | Y  | N  | Y  | N  | Y  | Critically low            |

| Review         | AMSTAR 2 Items |    |   |    |   |   |   |    |    |    |    |    |    |    |    |    | Overall confidence rating |
|----------------|----------------|----|---|----|---|---|---|----|----|----|----|----|----|----|----|----|---------------------------|
|                | 1              | 2  | 3 | 4  | 5 | 6 | 7 | 8  | 9  | 10 | 11 | 12 | 13 | 14 | 15 | 16 |                           |
| Hall 2021      | Y              | N  | Y | PY | Y | Y | N | PY | Y  | N  | N  | N  | N  | N  | Y  | Y  | Critically low            |
| Heinzel 2015   | Y              | N  | Y | N  | Y | Y | N | PY | Y  | N  | Y  | Y  | Y  | Y  | N  | Y  | Critically low            |
| Heissel 2019   | Y              | PY | Y | PY | Y | Y | Y | Y  | Y  | N  | Y  | Y  | Y  | Y  | Y  | Y  | High                      |
| Herring 2017   | Y              | N  | Y | PY | Y | Y | N | Y  | Y  | N  | Y  | Y  | N  | N  | Y  | Y  | Critically low            |
| Josefsson 2014 | Y              | N  | Y | PY | N | N | N | PY | PY | N  | Y  | Y  | Y  | Y  | N  | N  | Critically low            |
| Kelley 2018    | Y              | Y  | Y | Y  | Y | Y | Y | Y  | Y  | Y  | Y  | Y  | Y  | Y  | Y  | Y  | High                      |
| Kelley 2015    | Y              | Y  | Y | Y  | Y | Y | Y | Y  | Y  | Y  | Y  | Y  | Y  | Y  | Y  | Y  | High                      |
| Krogh 2017     | Y              | Y  | Y | PY | N | Y | N | PY | Y  | Y  | Y  | Y  | Y  | Y  | Y  | Y  | Low                       |
| Kvam 2016      | Y              | N  | Y | Y  | Y | Y | Y | Y  | Y  | PY | N  | N  | Y  | Y  | N  | Y  | Critically low            |
| Lawlor 2001    | Y              | N  | Y | Y  | Y | Y | Y | Y  | Y  | PY | N  | Y  | N  | N  | Y  | N  | Critically low            |
| Lawrence 2017  | Y              | Y  | Y | Y  | Y | Y | Y | Y  | Y  | Y  | N  | N  | N  | Y  | N  | Y  | Critically low            |
| Lee 2021       | Y              | Y  | Y | N  | Y | Y | N | Y  | Y  | N  | Y  | Y  | Y  | Y  | N  | Y  | Critically low            |
| Lee 2020       | N              | N  | Y | N  | Y | N | N | PY | N  | N  | N  | N  | N  | N  | N  | Y  | Critically low            |
| Leng 2018      | Y              | N  | Y | PY | Y | Y | N | PY | Y  | N  | Y  | N  | N  | N  | Y  | Y  | Critically low            |
| Liu 2019       | Y              | N  | Y | N  | Y | Y | Y | N  | Y  | N  | Y  | Y  | N  | Y  | N  | Y  | Critically low            |
| Li 2019        | Y              | N  | Y | PY | Y | Y | N | PY | Y  | N  | Y  | N  | N  | Y  | N  | Y  | Critically low            |
| Li 2019        | Y              | N  | Y | N  | Y | Y | N | PY | Y  | N  | Y  | Y  | Y  | Y  | Y  | Y  | Critically low            |

| Review               | AMSTAR 2 Items |    |   |    |   |   |   |    |    |    |    |    |    |    |    |    | Overall confidence rating |
|----------------------|----------------|----|---|----|---|---|---|----|----|----|----|----|----|----|----|----|---------------------------|
|                      | 1              | 2  | 3 | 4  | 5 | 6 | 7 | 8  | 9  | 10 | 11 | 12 | 13 | 14 | 15 | 16 |                           |
| Lund 2020            | N              | Y  | Y | PY | Y | N | N | N  | Y  | N  | N  | Y  | Y  | N  | N  | Y  | Critically low            |
| Lyu 2021             | Y              | Y  | Y | PY | Y | Y | N | PY | Y  | N  | N  | N  | N  | N  | N  | Y  | Critically low            |
| McCurdy 2017         | Y              | N  | Y | PY | Y | Y | N | PY | Y  | N  | Y  | Y  | Y  | Y  | N  | Y  | Critically low            |
| McGettigan 2020      | Y              | Y  | Y | Y  | Y | Y | Y | Y  | Y  | Y  | Y  | Y  | Y  | Y  | N  | Y  | Low                       |
| McGranahan 2021      | N              | N  | N | N  | N | N | N | PY | N  | N  | Y  | Y  | Y  | Y  | Y  | Y  | Critically low            |
| Miller 2020          | Y              | Y  | Y | PY | Y | Y | N | Y  | Y  | N  | Y  | Y  | Y  | Y  | Y  | Y  | Low                       |
| Miller 2020          | Y              | Y  | Y | PY | N | Y | N | Y  | Y  | N  | Y  | Y  | Y  | Y  | Y  | Y  | Low                       |
| Mishra 2012          | Y              | Y  | Y | Y  | Y | Y | Y | Y  | Y  | Y  | Y  | Y  | Y  | Y  | Y  | Y  | High                      |
| Morres 2019          | Y              | N  | Y | PY | Y | Y | N | PY | Y  | N  | Y  | Y  | Y  | Y  | Y  | N  | Critically low            |
| Nebiker 2018         | Y              | N  | Y | N  | Y | Y | N | PY | Y  | N  | Y  | Y  | Y  | N  | Y  | Y  | Critically low            |
| Nixon 2005           | Y              | Y  | Y | Y  | Y | Y | Y | PY | PY | N  | Y  | N  | N  | N  | N  | Y  | Critically low            |
| Park 2014            | Y              | N  | Y | Y  | Y | Y | N | N  | Y  | N  | Y  | Y  | Y  | N  | Y  | N  | Critically low            |
| Patsou 2017          | Y              | N  | Y | N  | N | N | N | Y  | Y  | N  | Y  | N  | N  | N  | Y  | Y  | Critically low            |
| Pavey 2011           | Y              | N  | Y | N  | Y | N | Y | PY | Y  | N  | Y  | N  | N  | Y  | N  | Y  | Critically low            |
| Pearsall 2014        | Y              | N  | Y | N  | N | N | N | PY | Y  | N  | Y  | N  | N  | Y  | N  | Y  | Critically low            |
| Peddle-McIntyre 2019 | Y              | Y  | Y | Y  | Y | Y | Y | PY | Y  | N  | Y  | N  | N  | Y  | N  | Y  | Critically low            |
| Pentland             | Y              | PY | Y | N  | Y | Y | N | PY | Y  | N  | Y  | N  | N  | Y  | Y  | Y  | Critically low            |



| Review             | AMSTAR 2 Items |    |   |    |   |   |    |    |    |    |    |    |    |    |    |    | Overall confidence rating |
|--------------------|----------------|----|---|----|---|---|----|----|----|----|----|----|----|----|----|----|---------------------------|
|                    | 1              | 2  | 3 | 4  | 5 | 6 | 7  | 8  | 9  | 10 | 11 | 12 | 13 | 14 | 15 | 16 |                           |
| Ramachandran 2021  | Y              | N  | Y | PY | Y | Y | Y  | PY | Y  | Y  | Y  | N  | N  | Y  | N  | Y  | Critically low            |
| Ramirez-velez 2021 | Y              | PY | Y | N  | Y | Y | N  | PY | Y  | N  | Y  | Y  | Y  | Y  | Y  | Y  | Critically low            |
| Ramos-Sanchez 2021 | Y              | Y  | Y | PY | Y | Y | PY | PY | Y  | Y  | Y  | N  | Y  | Y  | Y  | Y  | High                      |
| Rhyner 2016        | Y              | N  | Y | PY | N | N | N  | PY | N  | N  | Y  | N  | N  | N  | Y  | N  | Critically low            |
| Rosenbaum 2015     | Y              | N  | Y | Y  | Y | Y | N  | PY | PY | N  | Y  | N  | N  | Y  | Y  | N  | Critically low            |
| Russ 2021          | Y              | N  | Y | N  | Y | N | N  | PY | Y  | N  | Y  | N  | N  | Y  | N  | Y  | Critically low            |
| Salihu 2021        | Y              | Y  | Y | N  | Y | N | N  | Y  | Y  | N  | Y  | Y  | Y  | Y  | N  | Y  | Critically low            |
| Schuch 2016        | Y              | N  | Y | PY | Y | Y | N  | N  | Y  | N  | Y  | Y  | N  | N  | Y  | Y  | Critically low            |
| Schuch 2016        | Y              | N  | Y | PY | Y | Y | N  | N  | Y  | N  | Y  | Y  | Y  | N  | Y  | Y  | Critically low            |
| Schumacher 2021    | Y              | PY | Y | PY | Y | Y | N  | N  | Y  | N  | N  | N  | N  | Y  | N  | N  | Critically low            |
| Singh 2018         | Y              | N  | N | Y  | N | N | N  | N  | Y  | N  | Y  | Y  | Y  | Y  | Y  | Y  | Critically low            |
| Singh 2020         | Y              | N  | Y | Y  | N | N | N  | Y  | Y  | N  | Y  | Y  | Y  | N  | N  | Y  | Critically low            |
| Stathopoulos 2006  | N              | N  | Y | N  | N | N | Y  | Y  | N  | N  | N  | N  | N  | N  | Y  | N  | Critically low            |
| Stubbs 2017        | Y              | N  | Y | Y  | Y | Y | N  | Y  | Y  | N  | Y  | N  | N  | Y  | Y  | Y  | Critically low            |
| Tu 2014            | Y              | N  | Y | N  | N | Y | N  | Y  | Y  | N  | Y  | N  | Y  | Y  | Y  | Y  | Critically low            |
| vanHaren 2013      | N              | N  | Y | N  | N | N | N  | N  | Y  | N  | Y  | Y  | N  | N  | N  | N  | Critically low            |
| Vashistha 2016     | Y              | PY | Y | N  | Y | Y | N  | PY | Y  | N  | Y  | N  | N  | N  | N  | Y  | Critically low            |

| Review     | AMSTAR 2 Items |   |   |   |   |   |   |    |    |    |    |    |    |    |    |    | Overall confidence rating |
|------------|----------------|---|---|---|---|---|---|----|----|----|----|----|----|----|----|----|---------------------------|
|            | 1              | 2 | 3 | 4 | 5 | 6 | 7 | 8  | 9  | 10 | 11 | 12 | 13 | 14 | 15 | 16 |                           |
| Wang 2014  | N              | N | Y | N | Y | Y | N | PY | PY | N  | N  | N  | N  | Y  | Y  | Y  | Critically low            |
| Wang 2019  | Y              | N | Y | N | Y | Y | N | N  | Y  | N  | N  | N  | N  | N  | N  | N  | Critically low            |
| Weber 2020 | Y              | N | N | N | N | Y | N | PY | Y  | N  | N  | N  | N  | N  | Y  | Y  | Critically low            |
| Wu 2019    | Y              | N | Y | N | Y | Y | N | PY | Y  | N  | N  | N  | N  | N  | N  | Y  | Critically low            |
| Xiang 2017 | Y              | Y | Y | N | Y | N | N | PY | Y  | N  | Y  | Y  | Y  | Y  | Y  | Y  | Critically low            |
| Yi 2021    | Y              | N | N | N | Y | Y | N | PY | Y  | N  | N  | N  | N  | Y  | Y  | Y  | Critically low            |
| Zeng 2019  | Y              | N | N | N | N | N | N | N  | Y  | N  | N  | N  | N  | N  | N  | Y  | Critically low            |
| Zeng 2014  | Y              | N | N | Y | Y | Y | N | PY | Y  | N  | N  | N  | N  | N  | N  | Y  | Critically low            |
| Zeng 2019  | Y              | N | N | Y | N | Y | N | PY | Y  | N  | Y  | Y  | Y  | Y  | N  | Y  | Critically low            |
| Zhang 2019 | Y              | N | N | Y | Y | Y | N | PY | Y  | N  | N  | Y  | N  | Y  | N  | Y  | Critically low            |
| Zhao 2019  | Y              | N | N | N | Y | Y | N | PY | Y  | N  | N  | N  | N  | N  | Y  | Y  | Critically low            |
| Zhou 2021  | Y              | N | N | N | Y | Y | N | PY | Y  | N  | Y  | N  | N  | Y  | N  | Y  | Critically low            |
| Zuo 2016   | Y              | N | N | N | Y | Y | N | PY | Y  | N  | N  | N  | N  | N  | Y  | N  | Critically low            |

Note: Y=yes; N=no; Partial Y=meets criteria for partial yes; N/A=not applicable as no meta-analysis conducted

Legend: AMSTAR 2 Items: 1) The Participant, Intervention, Comparator and Outcome (PICO) components included in the review research question and inclusion criteria; 2) Explicit statement included that review methods were established prior to conduct and significant deviations justified; 3) Selection of included study designs explained; 4) Comprehensive search strategy used; 5) Study selection performed in duplicate; 6) Data extraction performed in duplicate; 7) List of excluded studies with justification provided; 8) Included studies described in adequate detail; 9) Satisfactory technique used for assessing risk of bias in included studies; 10) Sources of funding for included studies reported; 11) Appropriate methods for statistical combination of results used if meta-analysis performed; 12) Potential impact of risk of bias of individual studies assessed if meta-analysis performed; 13) Risk of bias of individual studies accounted for in discussion of the review results; 14) Any heterogeneity observed in the review

results was explained and discussed; 15) Publication bias investigated and discussed if meta-analysis performed; 16) Authors reported any potential sources of conflict of interest.

eFigure 3. Results of meta-analyses that assessed depression using mean differences.

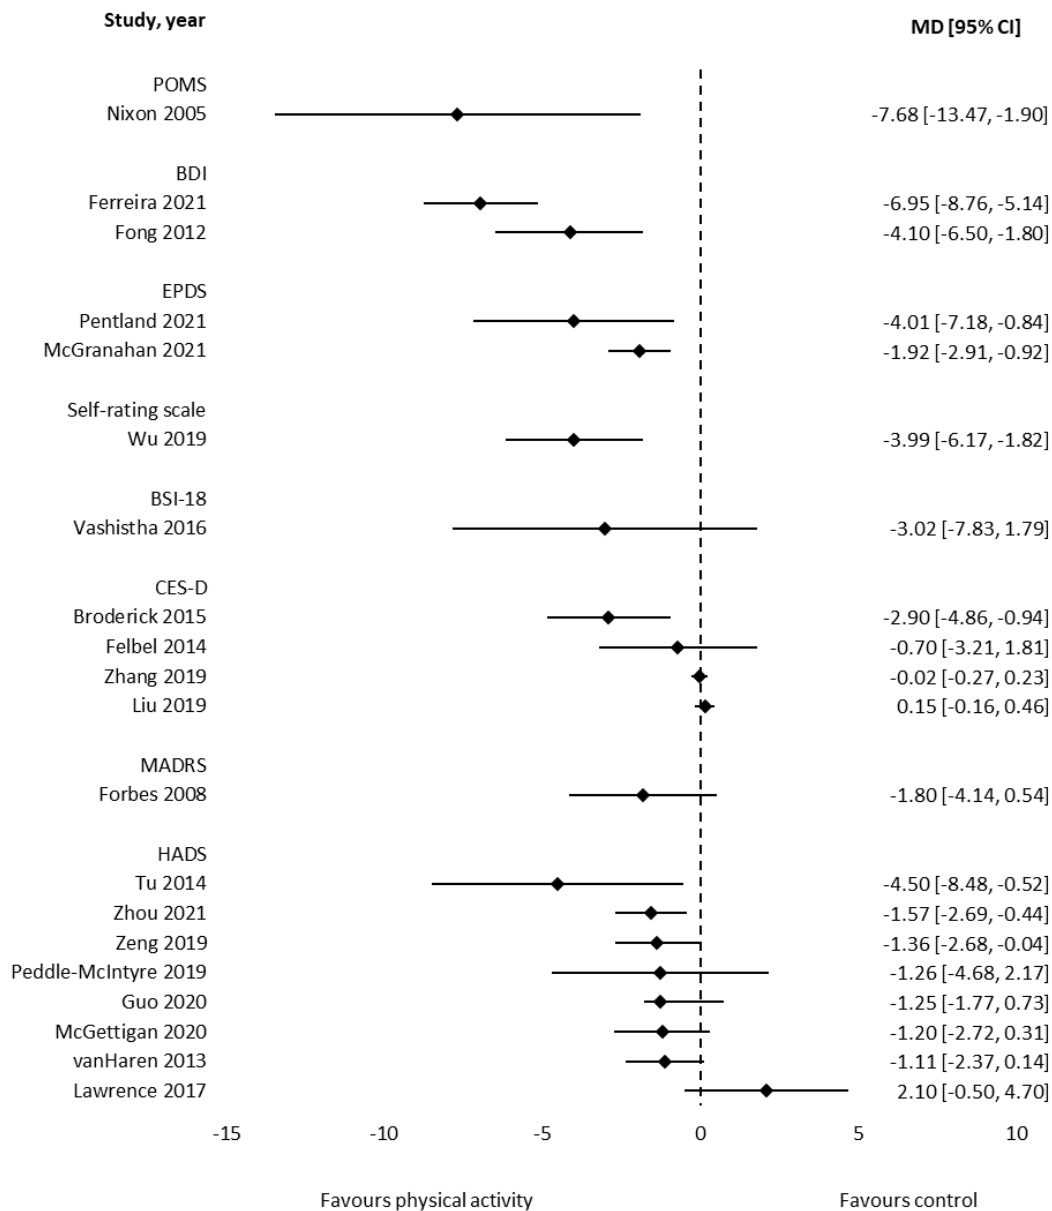

BDI: Beck Depression Inventory; CES-D: Center for Epidemiological Studies Depression; EPDS: The Edinburgh Postnatal Depression Scale; HADS: Hospital Anxiety and Depression Scale; MADRS: Montgomery-Asberg Depression Rating Scale; POMS: Profile of Mood States.

eTable 4. Overview of results of meta-analyses using mean differences for anxiety and depression.

|                                               | Reviews | Studies | Participants | Mean difference |        |        | Standardised mean difference (95% CI) |
|-----------------------------------------------|---------|---------|--------------|-----------------|--------|--------|---------------------------------------|
|                                               |         |         |              | 25%ile          | Median | 75%ile |                                       |
| Depression (instrument)                       |         |         |              |                 |        |        |                                       |
| Profile of Mood States                        | 1       | 2       | 65           |                 | -7.68  |        | -0.96 (-1.47, -0.44)                  |
| Beck Depression Inventory                     | 2       | 7       | >134         | -6.24           | -5.53  | -4.81  | -0.69 (-1.04, -0.34)                  |
| The Edinburgh Postnatal Depression Scale      | 2       | 19      | 1110         | -3.49           | -2.97  | -2.44  | -0.74 (-0.86, -0.62)                  |
| Self-rating scale                             | 1       | 6       | 415          |                 | -3.99  |        | -0.79 (-0.99, -0.59)                  |
| Brief Symptom Inventory 18                    | 1       | 2       | 92           |                 | -3.02  |        |                                       |
| Center for Epidemiological Studies Depression | 4       | 6       | 847          | -1.25           | -0.36  | 0.02   | -0.72 (-0.85, -0.58)                  |
| Montgomery-Asberg Depression Rating Scale     | 1       | 1       | 117          |                 | -1.80  |        | -0.33 (-0.74, -0.07)                  |
| Hospital Anxiety and Depression Scale         | 8       | 15      | 622          | -1.41           | -1.26  | -1.18  | -0.18 (-0.33, -0.02)                  |
|                                               |         |         |              |                 |        |        |                                       |
| Anxiety (Instrument)                          |         |         |              |                 |        |        |                                       |
| The State-Trait Anxiety Inventory             | 3       | 4       | 262          | -6.01           | -3.61  | -1.66  | -0.51 (-0.76, -0.27)                  |
| Brief Symptom Inventory-18                    | 1       | 2       | 92           |                 | -5.45  |        | -0.49 (-0.91, -0.08)                  |
| Self-rating scale                             | 1       | 6       | 415          |                 | -4.57  |        | -0.41 (-0.61, -0.22)                  |
| Hospital Anxiety and                          | 10      | 22      | 3360         | -1.13           | -1.26  | -0.79  | -0.21 (-0.27, -0.14)                  |

|                     |  |  |  |  |  |  |  |
|---------------------|--|--|--|--|--|--|--|
| Depression<br>Scale |  |  |  |  |  |  |  |
|                     |  |  |  |  |  |  |  |

eFigure 5. Results of meta-analyses that assessed anxiety using mean differences.

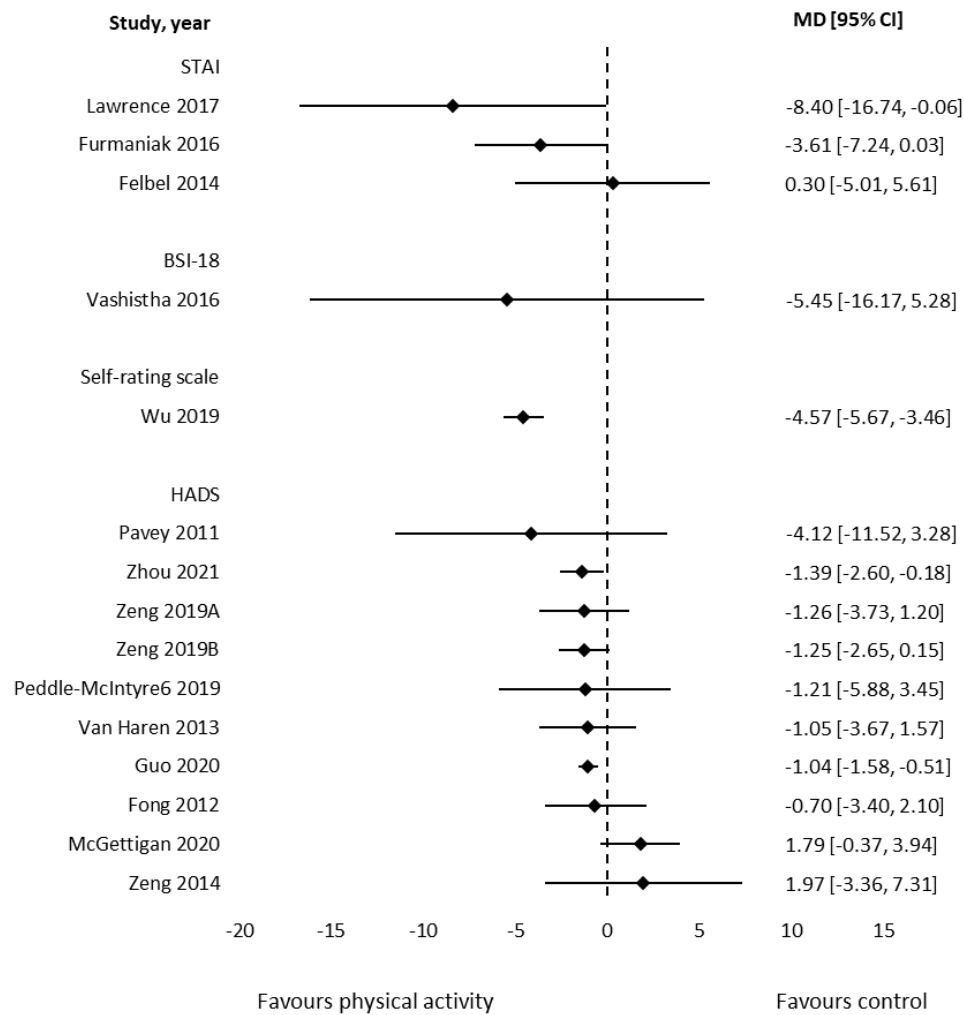

BSI-18: Brief Symptom Inventory-18; HADS: Hospital Anxiety and Depression Scale; STAI: The State-Trait Anxiety Inventory.

Figure 6. Results of subgroup meta-analyses for depression based on physical activity mode.

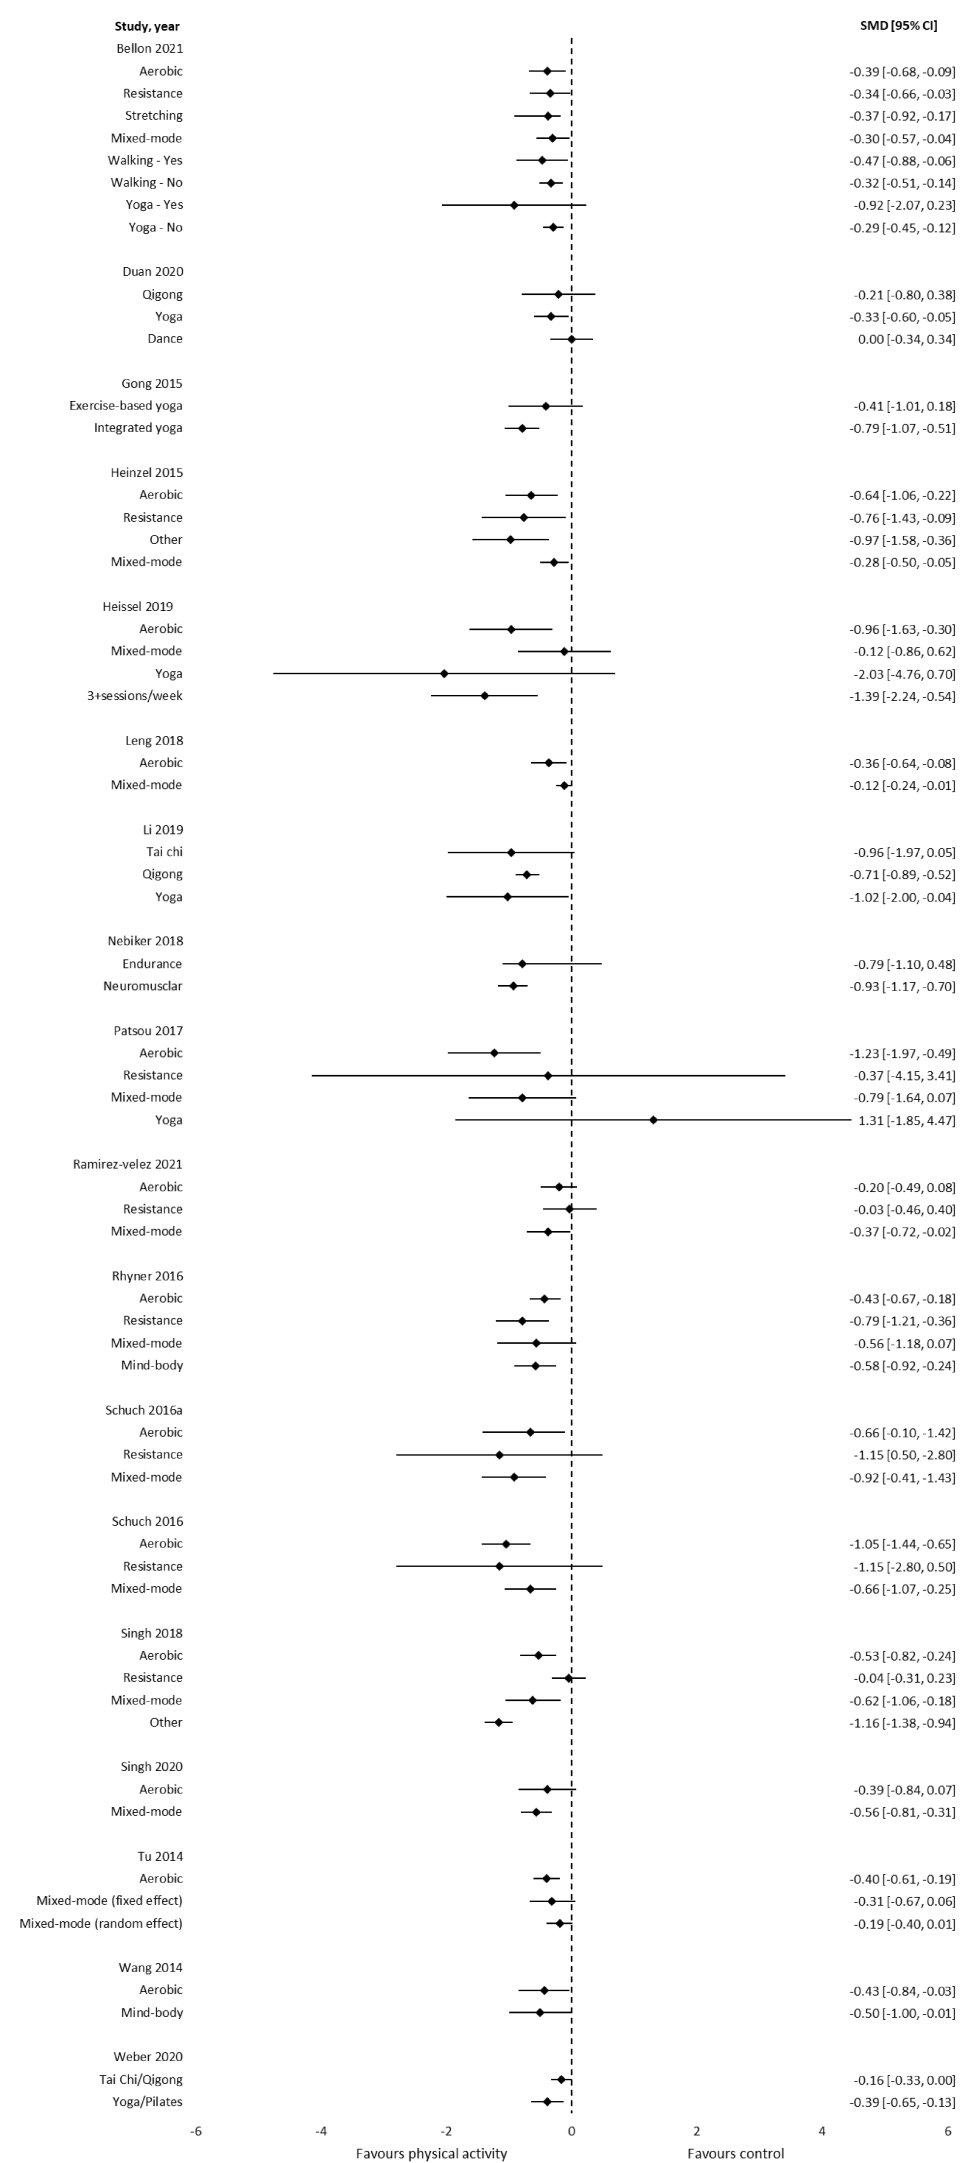



Figure 7. Results of subgroup meta-analyses for anxiety based on physical activity mode.

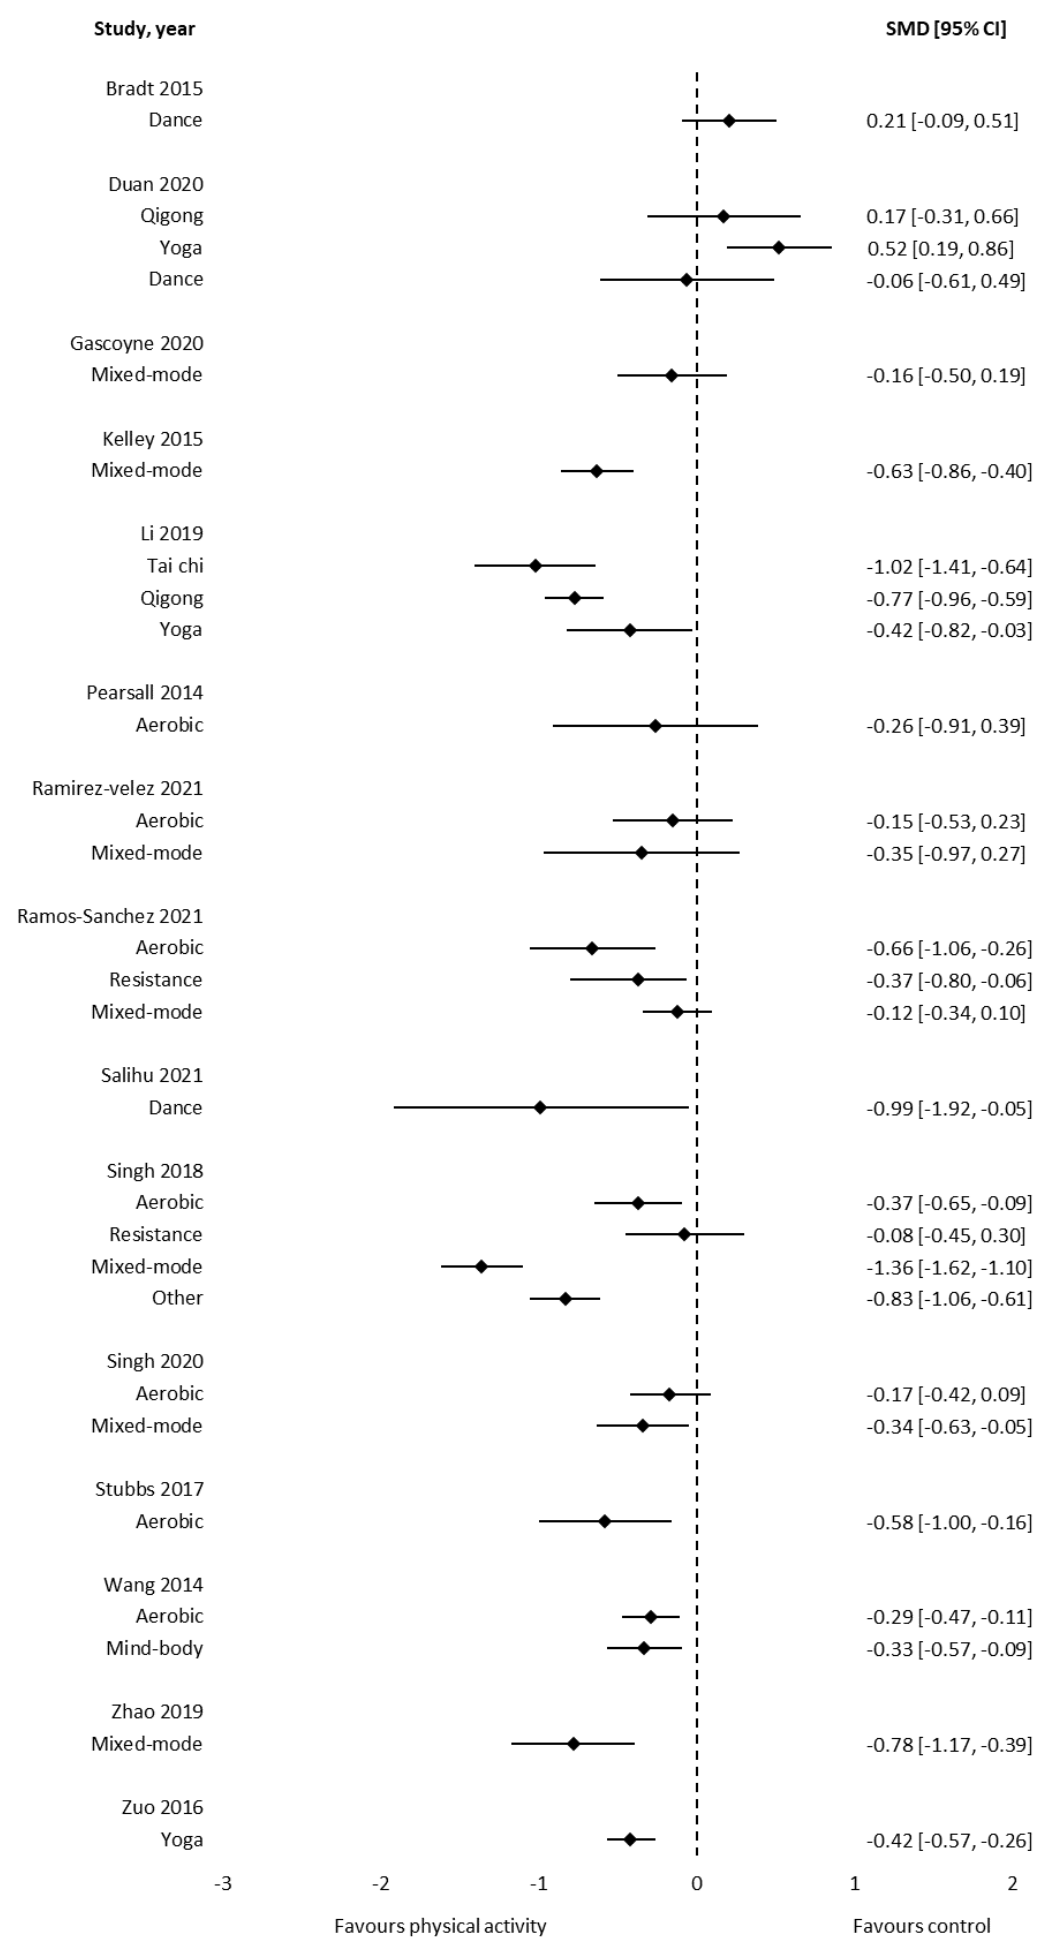

Figure 8. Results of subgroup meta-analyses for depression based on physical activity intensity.

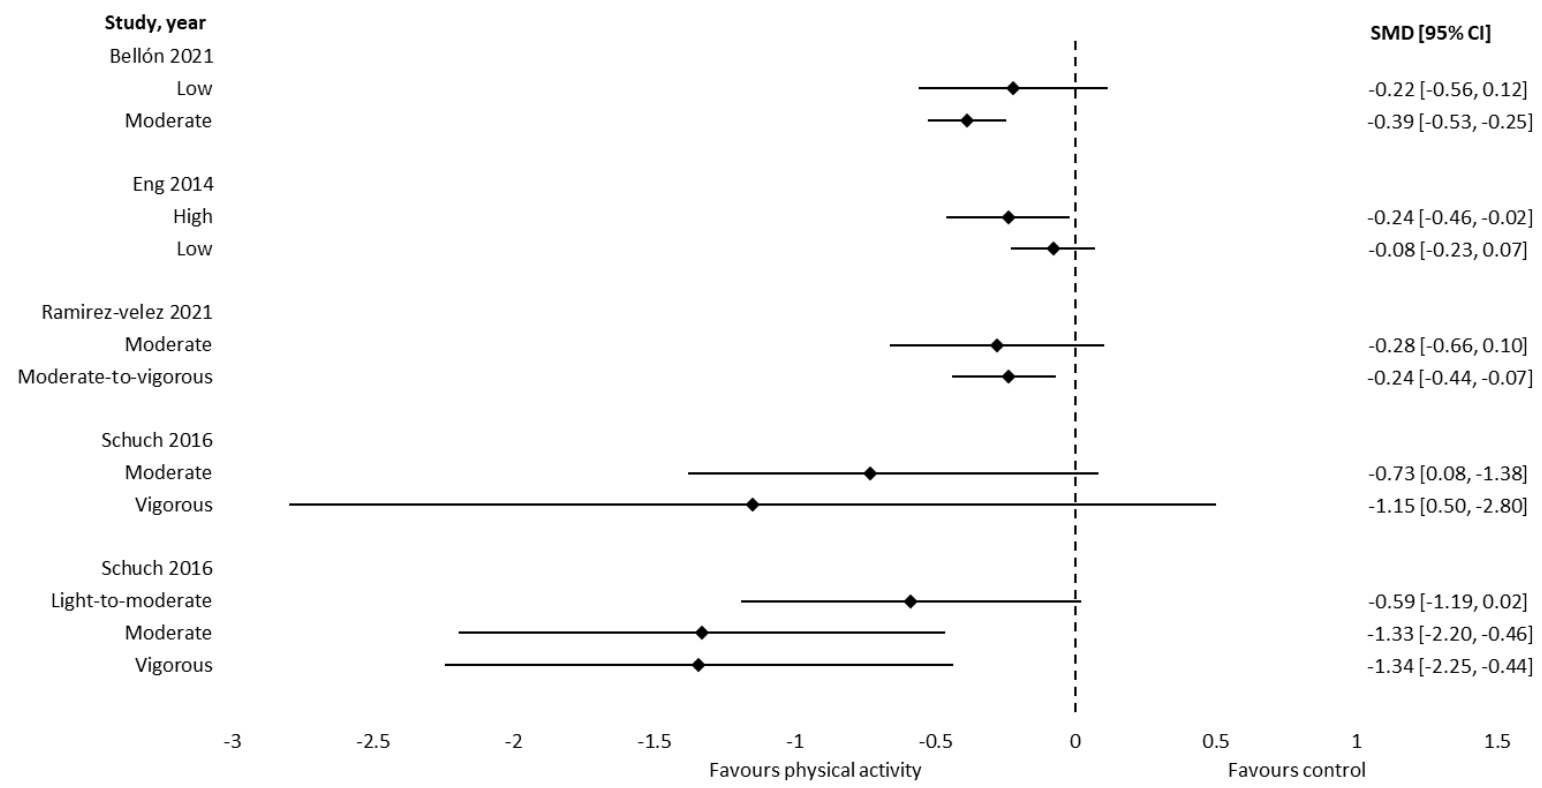

Figure 9: Results of subgroup meta-analyses for anxiety based on physical activity intensity.

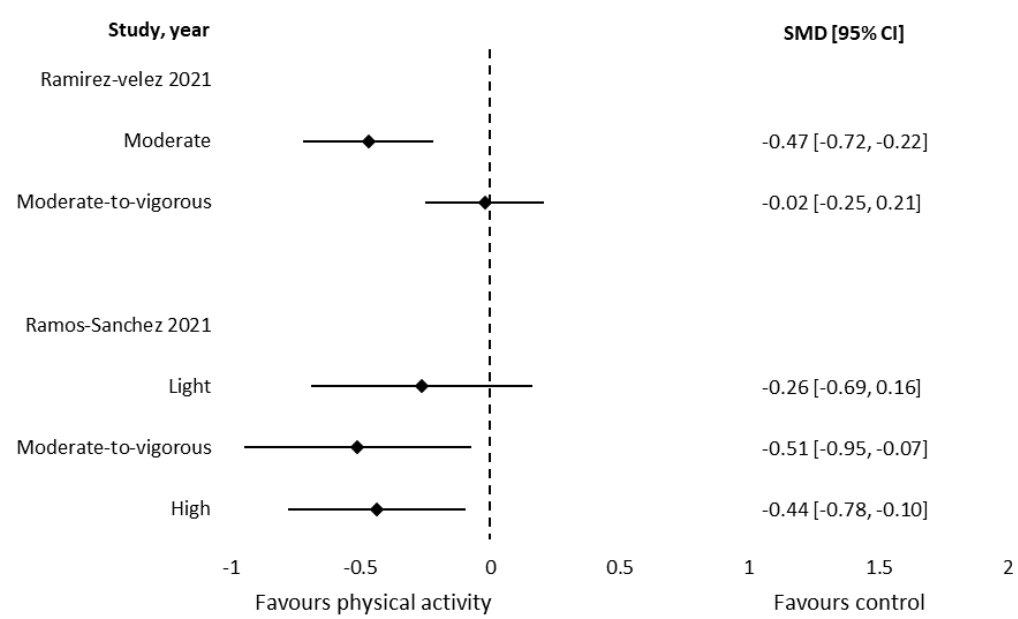

Figure 10: Results of subgroup meta-analyses for depression based on intervention duration.

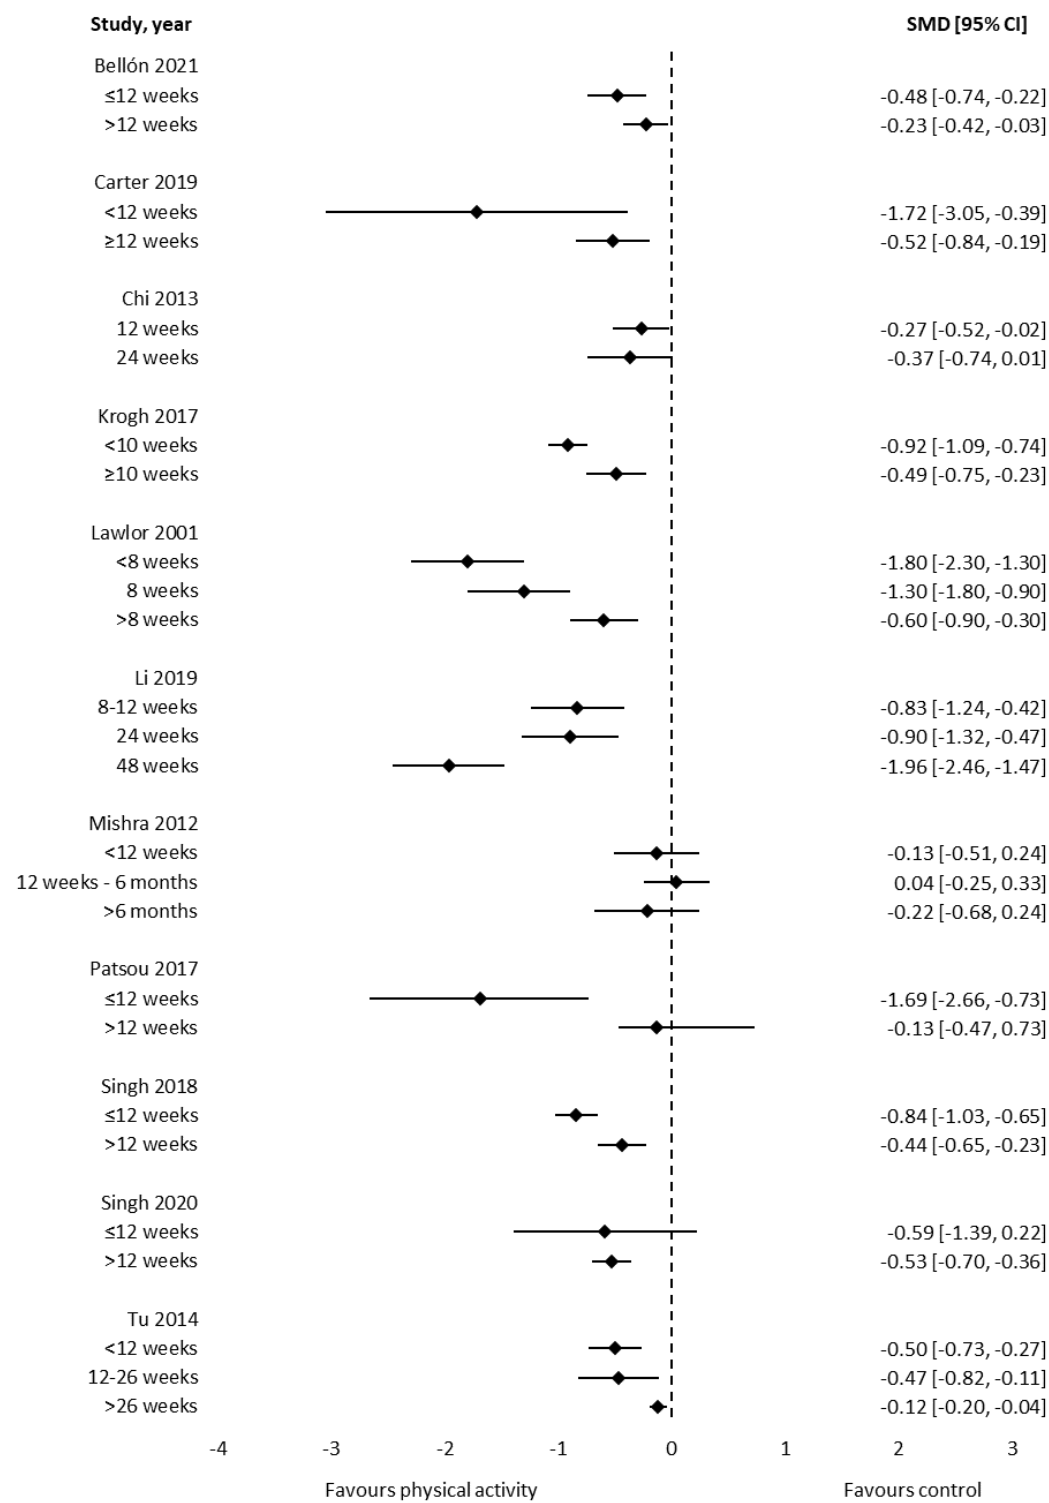

Figure 11: Results of subgroup meta-analyses for anxiety based on intervention duration.

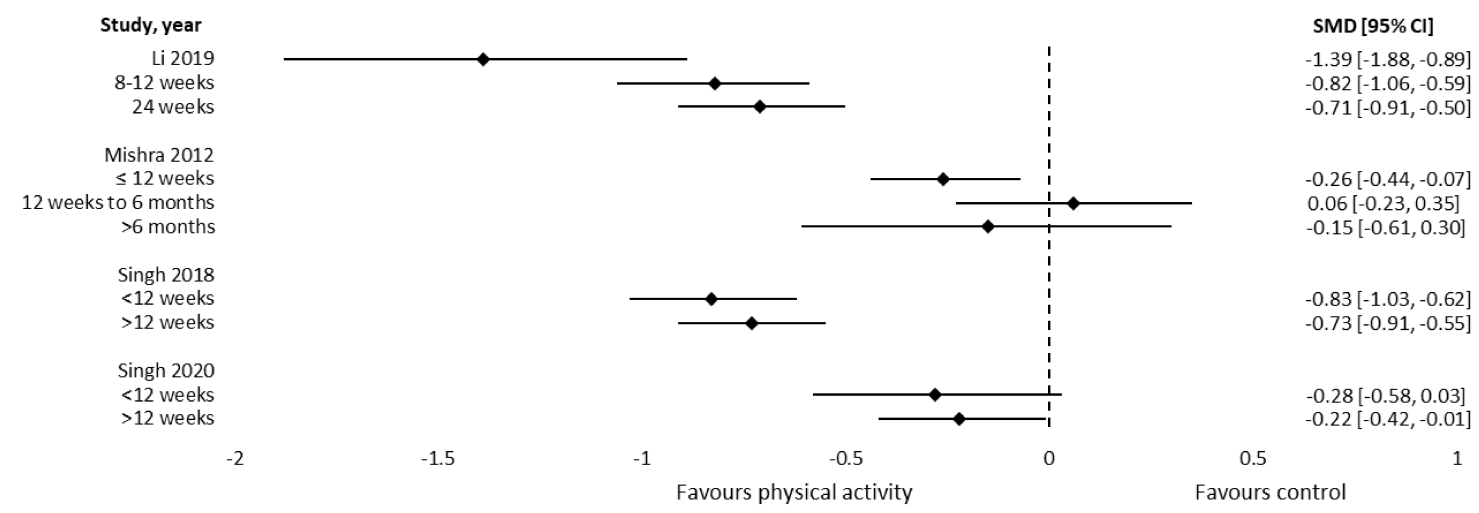

Figure 12: Results of subgroup meta-analyses for depression based on weekly duration.

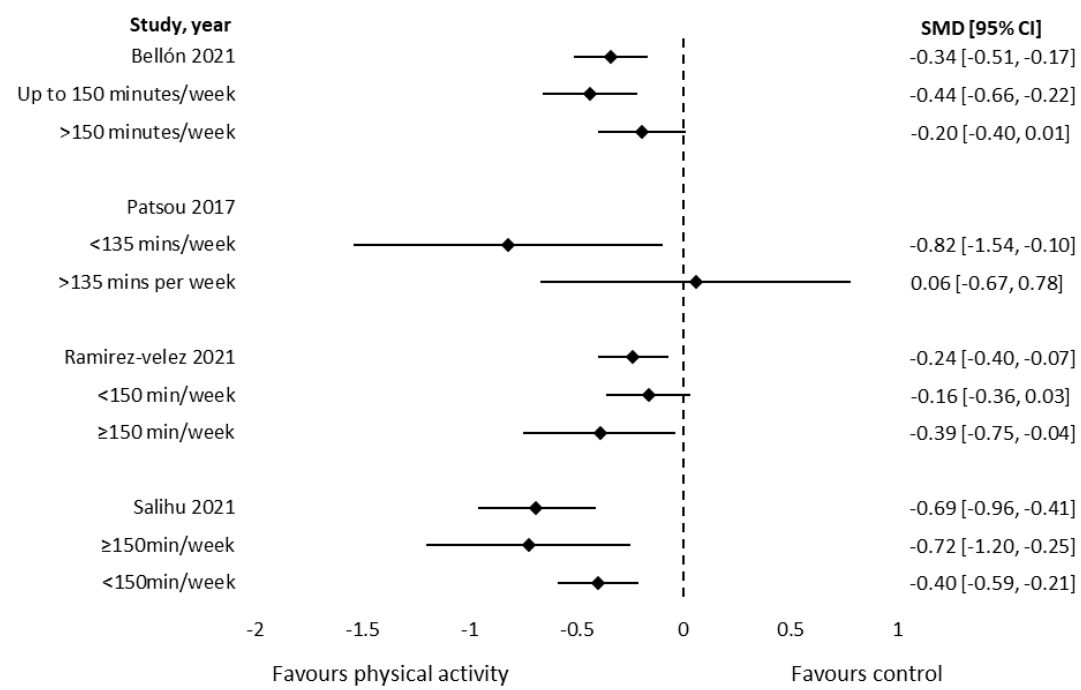

Figure 13: Results of subgroup meta-analyses for anxiety based on weekly duration, session duration and session frequency.

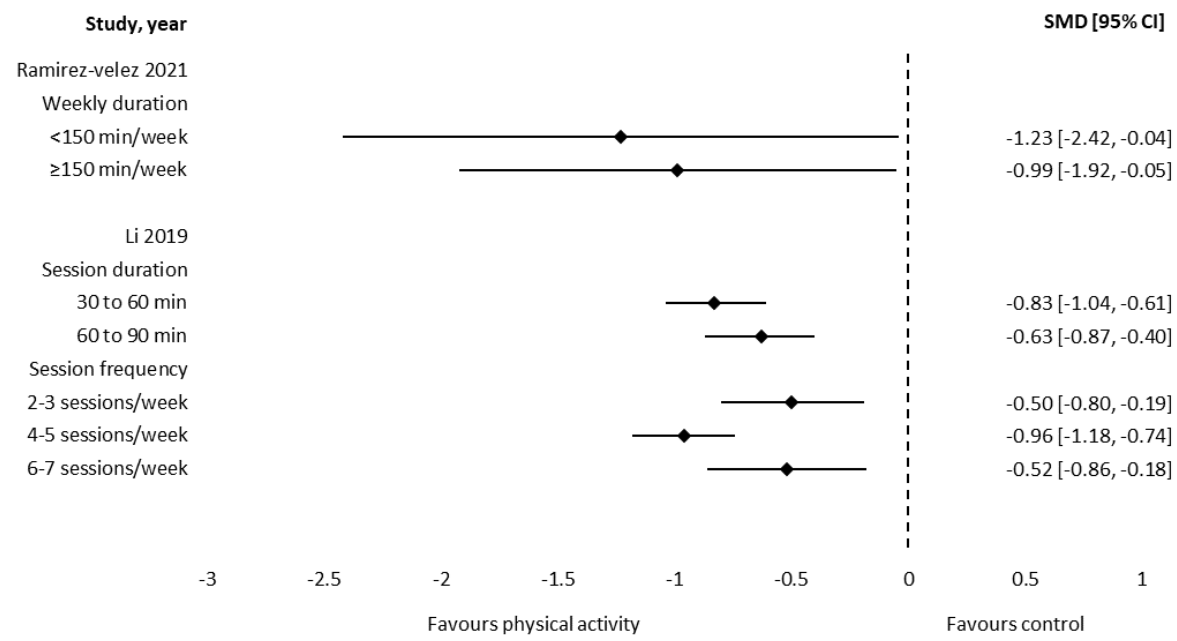

eFigure 14: Results of subgroup meta-analyses for depression based on session frequency.

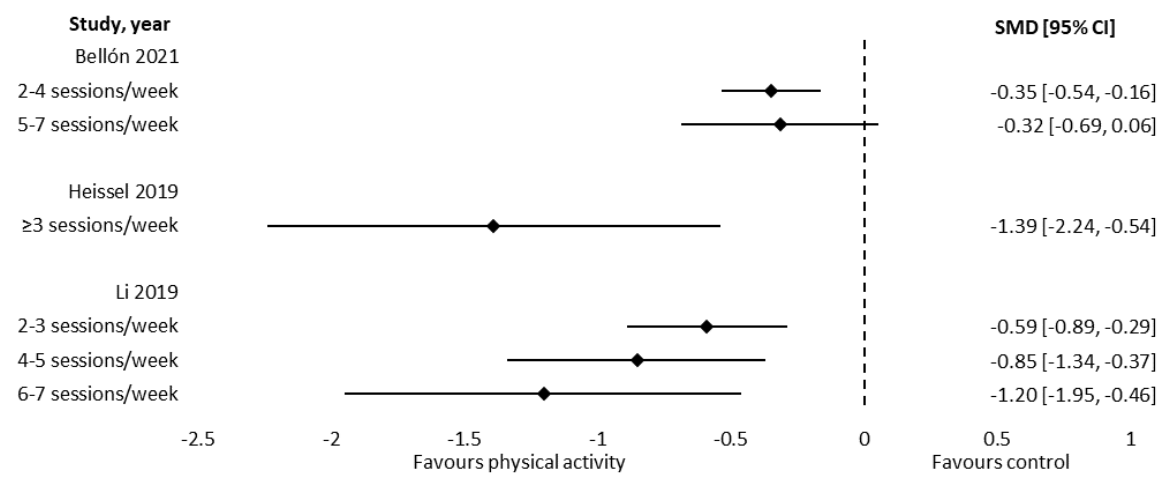



eFigure 15: Results of subgroup meta-analyses for depression based on session duration.

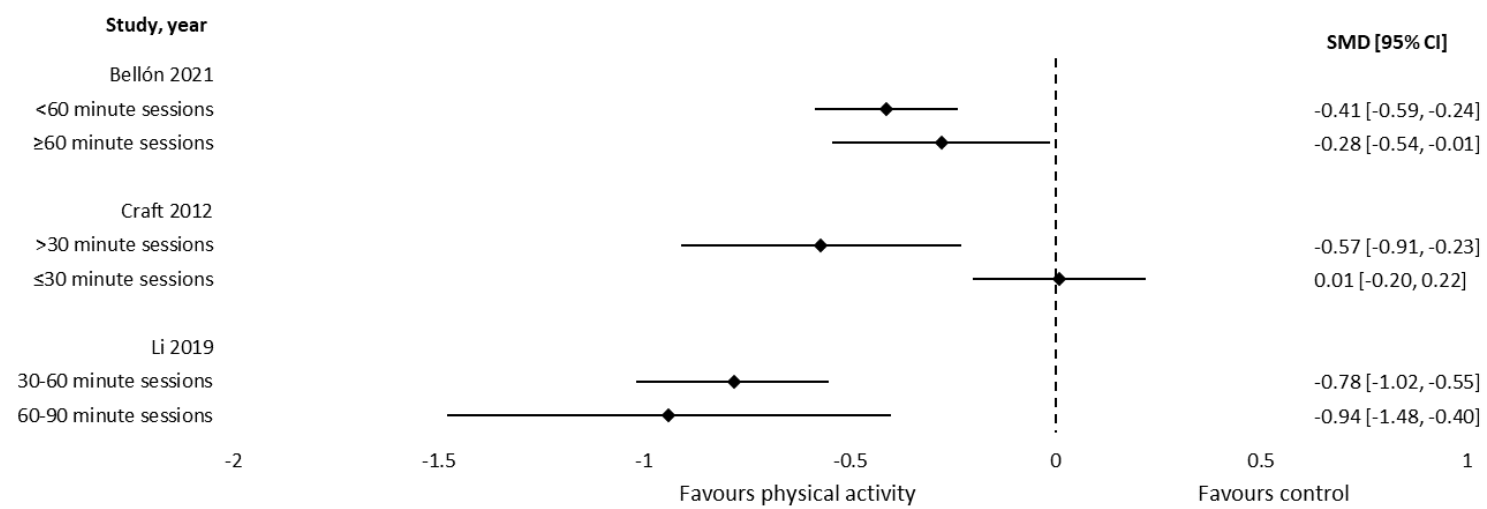

Supplement: bjsports-2022-106195supp001.pdf [file bjsports-2022-106195supp001.pdf]
